# Supplementary material
Source: publisher figshare collection journal article supplement (https://rs.figshare.com/ndownloader/files/12818447)
Supplement: Supplementary file 1 [file 12818447]

## Sheet: final_metabolic_results_for_pap
clade	genus	species	family	status	width	length	max_size	biomass	latitude	longitude	palaeo_lat	palaeo_long	age	B0	avg_temp	min_temp	max_temp	B_ind_avg	B_ind_min	B_ind_max	B_ind_no_constant	B_ind_no_temp
bivalve	Abra	aequalis	Semelidae	extant	8.037	7.234	8.037	0.00467764	27.7009	-82.4914	NA	NA	LGM	140000000000	288.525	289.712	299.478	6.28595e-05	6.99589e-05	0.000163484	4.48996e-16	1.40815e+07
bivalve	Acrosterigma	dalli	Cardiidae	extinct	71.149	107.288	107.288	9.77521	27.3666	-82.451	27.4507	-82.1314	mPWP	140000000000	294.79	296.364	305.185	0.0338564	0.0387835	0.0809183	2.41831e-13	4.35234e+09
bivalve	Agnocardia	spinosifrons	Cardiidae	extinct	47.003	53.542	53.542	1.25791	26.2759	-81.6653	26.3577	-81.3491	mPWP	140000000000	293.689	296.119	304.281	0.00660934	0.00815927	0.0161545	4.72096e-14	9.35114e+08
bivalve	Amusium	mortoni	Pectinidae	extinct	149.114	147.551	149.114	25.8154	27.3666	-82.451	27.4507	-82.1314	mPWP	130000000000	294.79	296.364	305.185	0.0651284	0.0746066	0.15566	5.00988e-13	8.37246e+09
bivalve	Anadara	aequalitas	Arcidae	extinct	36.748	28.533	36.748	0.414419	26.6795	-80.7131	NA	NA	LIG	130000000000	289.903	292.696	303.231	0.00190848	0.00244608	0.00598678	1.46806e-14	3.77592e+08
bivalve	Anadara	aequalitas	Arcidae	extinct	37.525	24.95	37.525	0.440805	26.6595	-80.6765	NA	NA	LIG	130000000000	289.903	292.696	303.231	0.00199891	0.00256198	0.00627045	1.53762e-14	3.95483e+08
bivalve	Anadara	alumensis	Arcidae	extinct	34.337	29.627	34.337	0.339234	30.3876	-84.6454	30.478	-84.3162	mPWP	130000000000	289.525	293.397	304.471	0.0015875	0.00223872	0.00570118	1.22115e-14	3.24951e+08
bivalve	Anadara	alumensis	Arcidae	extinct	42.491	38.613	42.491	0.636028	30.388	-84.6462	30.4785	-84.317	mPWP	130000000000	289.525	293.397	304.471	0.00254359	0.00358701	0.00913476	1.95661e-14	5.20656e+08
bivalve	Anadara	aresta	Arcidae	extinct	35.586	25.333	35.586	0.376941	30.3869	-84.6469	30.4774	-84.3177	mPWP	130000000000	289.525	293.397	304.471	0.00171808	0.00242287	0.00617014	1.3216e-14	3.51681e+08
bivalve	Anadara	aresta	Arcidae	extinct	35.776	23.621	35.776	0.382909	30.4642	-84.9871	30.5556	-84.6579	mPWP	130000000000	289.525	293.397	304.471	0.00173845	0.00245159	0.00624327	1.33727e-14	3.55848e+08
bivalve	Anadara	callicestosa	Arcidae	extinct	34.69	27.01	34.69	0.349625	27.3666	-82.451	27.4507	-82.1314	mPWP	130000000000	294.79	296.364	305.185	0.00258561	0.0029619	0.00617973	1.98893e-14	3.32388e+08
bivalve	Anadara	campsa	Arcidae	extinct	39.725	26.112	39.725	0.521481	30.4642	-84.9871	30.5556	-84.6579	mPWP	130000000000	289.525	293.397	304.471	0.00219164	0.00309068	0.0078708	1.68587e-14	4.48613e+08
bivalve	Anadara	catasarca	Arcidae	extinct	37.222	30.232	37.222	0.430387	26.3854	-80.5761	NA	NA	LIG	130000000000	289.903	292.696	303.231	0.00196337	0.00251643	0.00615897	1.51029e-14	3.88452e+08
bivalve	Anadara	catasarca	Arcidae	extinct	38.742	29.057	38.742	0.484325	26.6595	-80.6765	NA	NA	LIG	130000000000	289.903	292.696	303.231	0.00214517	0.00274943	0.00672925	1.65013e-14	4.2442e+08
bivalve	Anadara	hoerleae	Arcidae	extinct	64.539	40.513	64.539	2.18261	27.3666	-82.451	27.4507	-82.1314	mPWP	130000000000	294.79	296.364	305.185	0.0102116	0.0116977	0.0244061	7.85506e-14	1.31273e+09
bivalve	Anadara	idonea	Arcidae	extinct	34.869	33.676	34.869	0.354974	30.3876	-84.6454	30.478	-84.3162	mPWP	130000000000	289.525	293.397	304.471	0.00164243	0.00231618	0.00589845	1.26341e-14	3.36195e+08
bivalve	Anadara	idonea	Arcidae	extinct	42.657	38.081	42.657	0.643386	30.3914	-84.6421	30.4818	-84.3129	mPWP	130000000000	289.525	293.397	304.471	0.00256562	0.00361809	0.00921391	1.97356e-14	5.25167e+08
bivalve	Anadara	lienosa	Arcidae	extinct	54.084	32.447	54.084	1.29584	30.3866	-84.646	30.477	-84.3168	mPWP	130000000000	289.525	293.397	304.471	0.00433765	0.00611703	0.0155778	3.33665e-14	8.87888e+08
bivalve	Anadara	notoflorida	Arcidae	extinct	46.495	29.163	46.495	0.829561	27.3666	-82.451	27.4507	-82.1314	mPWP	130000000000	294.79	296.364	305.185	0.00494308	0.00566245	0.0118142	3.80237e-14	6.35447e+08
bivalve	Anadara	propearesta	Arcidae	extinct	38.893	22.418	38.893	0.489915	30.3866	-84.646	30.477	-84.3168	mPWP	130000000000	289.525	293.397	304.471	0.00209137	0.00294928	0.0075107	1.60874e-14	4.28089e+08
bivalve	Anadara	propearesta	Arcidae	extinct	44.826	24.558	44.826	0.744755	30.388	-84.6462	30.4785	-84.317	mPWP	130000000000	289.525	293.397	304.471	0.00286319	0.00403771	0.0102825	2.20245e-14	5.86075e+08
bivalve	Angulus	versicolor	Tellinidae	extant	13.5	8.2	13.5	0.0216015	25.9397	-81.7075	NA	NA	PI	140000000000	288.435	294.332	302.869	0.0001964	0.000331617	0.000682714	1.40286e-15	4.43599e+07
bivalve	Anodontia	alba	Lucinidae	extant	38.48	32.248	38.48	0.474726	26.6595	-80.6765	NA	NA	LIG	140000000000	289.903	292.696	303.231	0.00227576	0.0029168	0.00713889	1.62554e-14	4.50257e+08
bivalve	Anodontia	alba	Lucinidae	extant	40.646	43.675	43.675	0.689743	19.9193	-75.1388	NA	NA	LGM	140000000000	275.618	298.568	301.344	0.000782232	0.00640709	0.00808545	5.58737e-15	5.95859e+08
bivalve	Anodontia	alba	Lucinidae	extant	45.336	40.338	45.336	0.77003	28.0406	-82.6761	NA	NA	LGM	140000000000	288.525	289.712	299.478	0.00288889	0.00321517	0.0075134	2.0635e-14	6.47156e+08
bivalve	Anodontia	schrammi	Lucinidae	extant	78.5	NA	78.5	3.88925	16.265	-61.551	NA	NA	PI	140000000000	275.546	298.84	301.852	0.00284189	0.0239894	0.0308573	2.02992e-14	2.18035e+09
bivalve	Anomalocardia	cuneimeris	Tellinidae	extant	15.372	10.45	15.372	0.0316851	27.0934	-82.3609	NA	NA	LGM	140000000000	289.403	293.421	300.888	0.000285714	0.000408211	0.000772401	2.04082e-15	5.91248e+07
bivalve	Anomalocardia	cuneimeris	Tellinidae	extant	15.407	10.184	15.407	0.0318984	29.8759	-81.3509	NA	NA	LGM	140000000000	282.912	290.284	300.827	0.000157938	0.000310765	0.000772345	1.12813e-15	5.9423e+07
bivalve	Anomia	simplex	Anomiidae	extant	14.26	18.2	18.2	0.0521448	29.8759	-81.3509	NA	NA	LGM	130000000000	282.912	290.284	300.827	0.000212024	0.000417186	0.00103683	1.63095e-15	7.97722e+07
bivalve	Antillipecten	antillarum	Pectinidae	extant	16.776	17.09	17.09	0.0433101	26.6595	-80.6765	NA	NA	LIG	130000000000	289.903	292.696	303.231	0.000350793	0.000449606	0.00110041	2.69841e-15	6.94041e+07
bivalve	Antillipecten	antillarum	Pectinidae	extant	16.854	17.98	17.98	0.0503071	26.6595	-80.6765	NA	NA	LIG	130000000000	289.903	292.696	303.231	0.000392492	0.000503051	0.00123122	3.01917e-15	7.76543e+07
bivalve	Antillipecten	antillarum	Pectinidae	extant	22.584	23.406	23.406	0.109525	19.956	-75.1299	NA	NA	LGM	130000000000	275.618	298.568	301.344	0.000182713	0.00149656	0.0018886	1.40549e-15	1.3918e+08
bivalve	Arca	wagneriana	Arcidae	extinct	82.792	43.098	82.792	4.55057	27.3666	-82.451	27.4507	-82.1314	mPWP	130000000000	294.79	296.364	305.185	0.0177178	0.0202963	0.0423464	1.36291e-13	2.27768e+09
bivalve	Arca	wagneriana	Arcidae	extinct	85.625	38.906	85.625	5.02541	26.7619	-81.4385	26.843	-81.1204	mPWP	130000000000	293.689	296.119	304.281	0.0173427	0.0214096	0.0423887	1.33405e-13	2.4537e+09
bivalve	Arca	wagneriana	Arcidae	extinct	123.826	73.678	123.826	14.9209	26.9639	-81.2034	27.0443	-80.8843	mPWP	130000000000	293.689	296.119	304.281	0.0392268	0.0484257	0.0958778	3.01745e-13	5.54996e+09
bivalve	Arca	zebra	Arcidae	extant	54.905	20.866	54.905	1.35474	26.6595	-80.6765	NA	NA	LIG	130000000000	289.903	292.696	303.231	0.00463981	0.00594678	0.0145548	3.56908e-14	9.17983e+08
bivalve	Arca	zebra	Arcidae	extant	58.89	22.381	58.89	1.6658	26.7156	-80.6957	NA	NA	LIG	130000000000	289.903	292.696	303.231	0.00541784	0.00694396	0.0169954	4.16757e-14	1.07191e+09
bivalve	Arca	zebra	Arcidae	extant	83.695	35.678	83.695	4.69855	19.9193	-75.1388	NA	NA	LGM	130000000000	275.618	298.568	301.344	0.00306272	0.0250861	0.0316575	2.35594e-14	2.33301e+09
bivalve	Arcinella	cornuta	Chamidae	extant	44.803	44.803	44.803	0.743628	27.693	-82.4952	NA	NA	LGM	140000000000	288.525	289.712	299.478	0.00281428	0.00313213	0.00731935	2.0102e-14	6.30442e+08
bivalve	Arcinella	cornuta	Chamidae	extant	48.054	47.471	48.054	0.914328	27.3982	-82.388	27.4821	-82.0682	mPWP	140000000000	294.79	296.364	305.185	0.00572628	0.00655963	0.0136861	4.0902e-14	7.3613e+08
bivalve	Arcinella	cornuta	Chamidae	extant	48.62	52.454	52.454	1.18399	27.3803	-82.3779	27.4642	-82.0581	mPWP	140000000000	294.79	296.364	305.185	0.00695114	0.00796274	0.0166135	4.9651e-14	8.9359e+08
bivalve	Arcopagia	fausta	Tellinidae	extant	51.641	43.64	51.641	1.13067	26.6595	-80.6765	NA	NA	LIG	140000000000	289.903	292.696	303.231	0.00436309	0.00559211	0.0136867	3.11649e-14	8.63234e+08
bivalve	Arcopagia	fausta	Tellinidae	extant	55.645	48.89	55.645	1.40931	19.9618	-75.1269	NA	NA	LGM	140000000000	275.618	298.568	301.344	0.00133683	0.0109497	0.013818	9.54876e-15	1.01832e+09
bivalve	Arcopagia	fausta	Tellinidae	extant	61.393	53.843	61.393	1.88343	19.9618	-75.1269	NA	NA	LGM	140000000000	275.618	298.568	301.344	0.00166162	0.01361	0.0171752	1.18687e-14	1.26573e+09
bivalve	Arcopagia	fausta	Tellinidae	extant	69	59.6	69	2.65831	24.6699	-81.2546	NA	NA	PI	140000000000	289.236	298.119	304.399	0.00780202	0.0169659	0.0285884	5.57287e-14	1.63901e+09
bivalve	Argopecten	comparilis	Pectinidae	extinct	62.748	60.277	62.748	2.00872	26.2759	-81.6653	26.3577	-81.3491	mPWP	130000000000	293.689	296.119	304.281	0.0087182	0.0107627	0.0213089	6.70631e-14	1.23348e+09
bivalve	Armimiltha	disciformis	Lucinidae	extinct	61.915	70.571	70.571	2.84084	26.6595	-80.6765	NA	NA	LIG	140000000000	289.903	292.696	303.231	0.00870721	0.0111599	0.0273139	6.21944e-14	1.72272e+09
bivalve	Armimiltha	disciformis	Lucinidae	extinct	76.724	75.517	76.724	3.63536	26.7619	-81.4385	26.843	-81.1204	mPWP	140000000000	293.689	296.119	304.281	0.0146498	0.0180853	0.0358069	1.04642e-13	2.07271e+09
bivalve	Armimiltha	disciformis	Lucinidae	extinct	71.004	77.041	77.041	3.67985	27.3041	-81.025	27.384	-80.7045	mPWP	140000000000	293.689	296.119	304.281	0.0147841	0.018251	0.0361351	1.056e-13	2.0917e+09
bivalve	Armimiltha	disciformis	Lucinidae	extinct	77.544	78.07	78.07	3.82673	27.3389	-82.5309	27.4232	-82.2114	mPWP	140000000000	294.79	296.364	305.185	0.0167559	0.0191944	0.0400473	1.19685e-13	2.15402e+09
bivalve	Armimiltha	disciformis	Lucinidae	extinct	77.42	78.852	78.852	3.94092	27.3666	-82.451	27.4507	-82.1314	mPWP	140000000000	294.79	296.364	305.185	0.0171295	0.0196223	0.0409402	1.22353e-13	2.20204e+09
bivalve	Astarte	concentrica	Astartidae	extinct	31.719	26.638	31.719	0.268468	35.4614	-76.9182	35.5289	-76.5608	mPWP	140000000000	284.106	288.923	301.248	0.000872938	0.00135874	0.00395252	6.23527e-15	2.93628e+08
bivalve	Atrina	harrisii	Pinnidae	extinct	36.93	88.317	88.317	5.50593	27.3803	-82.3779	27.4642	-82.0581	mPWP	130000000000	294.79	296.364	305.185	0.0204401	0.0234148	0.0488529	1.57232e-13	2.62764e+09
bivalve	Atrina	harrisii	Pinnidae	extinct	47.816	108.152	108.152	10.0093	27.3803	-82.3779	27.4642	-82.0581	mPWP	130000000000	294.79	296.364	305.185	0.0320009	0.036658	0.0764837	2.46161e-13	4.11382e+09
bivalve	Atrina	rigida	Pinnidae	extant	74.971	164.239	164.239	34.3285	28.048	-80.5475	NA	NA	LGM	130000000000	280.562	289.884	301.145	0.0220417	0.0523132	0.138375	1.69552e-13	1.03678e+10
bivalve	Barbatia	caloosahatchiensis	Arcidae	extinct	46.731	33.334	46.731	0.842044	27.3666	-82.451	27.4507	-82.1314	mPWP	130000000000	294.79	296.364	305.185	0.00499876	0.00572623	0.0119473	3.8452e-14	6.42606e+08
bivalve	Barbatia	candida	Arcidae	extant	33.738	16.342	33.738	0.322071	19.9193	-75.1388	NA	NA	LGM	130000000000	275.618	298.568	301.344	0.000410298	0.00336066	0.004241	3.15613e-15	3.12541e+08
bivalve	Barbatia	candida	Arcidae	extant	36.735	19.475	36.735	0.413986	26.6595	-80.6765	NA	NA	LIG	130000000000	289.903	292.696	303.231	0.00190699	0.00244416	0.00598209	1.46691e-14	3.77296e+08
bivalve	Barbatia	candida	Arcidae	extant	45.78	23.361	45.78	0.79249	26.6595	-80.6765	NA	NA	LIG	130000000000	289.903	292.696	303.231	0.00310352	0.00397773	0.00973552	2.38732e-14	6.14029e+08
bivalve	Barbatia	domingensis	Arcidae	extant	15.837	7.51	15.837	0.0345967	26.6595	-80.6765	NA	NA	LIG	130000000000	289.903	292.696	303.231	0.000296405	0.000379897	0.0009298	2.28004e-15	5.86434e+07
bivalve	Barbatia	domingensis	Arcidae	extant	19.033	9.691	19.033	0.059504	19.9618	-75.1269	NA	NA	LGM	130000000000	275.618	298.568	301.344	0.000115623	0.000947044	0.00119513	8.89409e-16	8.80751e+07
bivalve	Barbatia	domingensis	Arcidae	extant	35.457	18.384	35.457	0.372924	26.6595	-80.6765	NA	NA	LIG	130000000000	289.903	292.696	303.231	0.00176329	0.00225998	0.00553132	1.35638e-14	3.48866e+08
bivalve	Barbatia	irregularis	Arcidae	extinct	27.556	15.253	27.556	0.177271	26.7619	-81.4385	26.843	-81.1204	mPWP	130000000000	293.689	296.119	304.281	0.00141161	0.00174264	0.00345025	1.08586e-14	1.9972e+08
bivalve	Botula	fusca	Mytilidae	extant	22.38	10.997	22.38	0.0959593	19.9352	-75.1245	NA	NA	LGM	130000000000	275.618	298.568	301.344	0.000165463	0.00135527	0.00171029	1.27279e-15	1.2604e+08
bivalve	Brachidontes	exustus	Mytilidae	extant	7.514	14.307	14.307	0.0256371	27.7009	-82.4914	NA	NA	LGM	130000000000	288.525	289.712	299.478	0.000209083	0.000232697	0.00054378	1.60833e-15	4.68376e+07
bivalve	Callucina	keenae	Lucinidae	extant	8.495	7.694	8.495	0.00550848	26.7135	-80.3686	NA	NA	LGM	140000000000	288.035	293.204	300.477	6.79693e-05	0.000107832	0.000200946	4.85495e-16	1.59185e+07
bivalve	Callucina	keenae	Lucinidae	extant	15.248	15.294	15.294	0.0312131	27.3666	-82.451	27.4507	-82.1314	mPWP	140000000000	294.79	296.364	305.185	0.000454777	0.000520961	0.00108694	3.24841e-15	5.84629e+07
bivalve	Cardita	olga	Carditidae	extinct	44.689	40.454	44.689	0.73806	27.3651	-82.4327	27.4492	-82.113	mPWP	140000000000	294.79	296.364	305.185	0.00487657	0.00558626	0.0116552	3.48326e-14	6.26898e+08
bivalve	Cardita	olga	Carditidae	extinct	45.688	40.258	45.688	0.787801	26.2759	-81.6653	26.3577	-81.3491	mPWP	140000000000	293.689	296.119	304.281	0.00465301	0.00574416	0.0113728	3.32358e-14	6.58325e+08
bivalve	Carditamera	arata	Carditidae	extinct	28.642	15.665	28.642	0.198683	30.3866	-84.646	30.477	-84.3168	mPWP	140000000000	289.525	293.397	304.471	0.00114458	0.0016141	0.00411051	8.17554e-15	2.34287e+08
bivalve	Carditamera	arata	Carditidae	extinct	32.865	17.988	32.865	0.298102	30.3866	-84.646	30.477	-84.3168	mPWP	140000000000	289.525	293.397	304.471	0.00155166	0.00218818	0.00557248	1.10833e-14	3.17616e+08
bivalve	Carditamera	arata	Carditidae	extinct	48.929	28.158	48.929	0.964319	27.3583	-82.4615	27.4424	-82.1419	mPWP	140000000000	294.79	296.364	305.185	0.00595952	0.00682681	0.0142435	4.2568e-14	7.66114e+08
bivalve	Carditamera	dasytes	Carditidae	extinct	47.202	21.028	47.202	0.867328	27.3666	-82.451	27.4507	-82.1314	mPWP	140000000000	294.79	296.364	305.185	0.00550406	0.00630507	0.013155	3.93147e-14	7.07564e+08
bivalve	Carditamera	floridana	Carditidae	extant	13.497	10.556	13.497	0.0215874	29.8759	-81.3509	NA	NA	LGM	140000000000	282.912	290.284	300.827	0.000117845	0.000231876	0.000576282	8.4175e-16	4.43382e+07
bivalve	Carditamera	tamiamiensis	Carditidae	extinct	79.366	58.042	79.366	4.01718	27.3666	-82.451	27.4507	-82.1314	mPWP	140000000000	294.79	296.364	305.185	0.0173775	0.0199064	0.041533	1.24125e-13	2.23393e+09
bivalve	Carolinapecten	eboreus	Pectinidae	extinct	108.825	98.954	108.825	10.1941	27.368	-82.4364	27.4521	-82.1167	mPWP	130000000000	294.79	296.364	305.185	0.0324432	0.0371646	0.0775407	2.49563e-13	4.17067e+09
bivalve	Cavilinga	blanda	Lucinidae	extant	4.217	4.346	4.346	0.000762719	27.1575	-82.379	NA	NA	LGM	140000000000	289.403	293.421	300.888	1.74608e-05	2.49469e-05	4.72036e-05	1.2472e-16	3.61328e+06
bivalve	Chama	corticosa	Chamidae	extinct	41.893	47.192	47.192	0.866786	27.3041	-81.025	27.384	-80.7045	mPWP	140000000000	293.689	296.119	304.281	0.00499868	0.0061709	0.0122177	3.57049e-14	7.07232e+08
bivalve	Chama	emmonsi	Chamidae	extinct	24.014	24.444	24.444	0.124482	30.3866	-84.646	30.477	-84.3168	mPWP	140000000000	289.525	293.397	304.471	0.000806035	0.00113669	0.00289471	5.75739e-15	1.6499e+08
bivalve	Chama	emmonsi	Chamidae	extinct	26.916	28.131	28.131	0.188407	30.3866	-84.646	30.477	-84.3168	mPWP	140000000000	289.525	293.397	304.471	0.00109988	0.00155108	0.00395	7.85631e-15	2.25139e+08
bivalve	Chama	heilprini	Chamidae	extinct	67.742	66.613	67.742	2.51786	26.2501	-80.8299	26.3294	-80.5133	mPWP	140000000000	291.56	296.269	304.681	0.00922097	0.0139085	0.0280856	6.5864e-14	1.57363e+09
bivalve	Chama	willcoxi	Chamidae	extinct	53.769	51.81	53.769	1.27371	27.3612	-82.4347	27.4453	-82.1151	mPWP	140000000000	294.79	296.364	305.185	0.00734256	0.00841113	0.0175491	5.24469e-14	9.43909e+08
bivalve	Chesapecten	madisonius	Pectinidae	extinct	86.037	85.145	86.037	5.09708	27.3708	-82.4053	27.4548	-82.0856	mPWP	130000000000	294.79	296.364	305.185	0.0192909	0.0220983	0.0461061	1.48391e-13	2.4799e+09
bivalve	Chesapecten	jeffersonius	Pectinidae	extinct	162.547	155.87	162.547	33.2957	37.1888	-76.6077	37.2554	-76.2419	mPWP	130000000000	289.11	287.771	299.556	0.0476889	0.0422393	0.118414	3.66837e-13	1.01329e+10
bivalve	Chesapecten	septenarius	Pectinidae	extinct	59.133	59.307	59.307	1.70084	27.3612	-82.4347	27.4453	-82.1151	mPWP	130000000000	294.79	296.364	305.185	0.00846951	0.00970208	0.0202425	6.515e-14	1.08878e+09
bivalve	Chione	erosa	Veneridae	extinct	21.518	19.174	21.518	0.0854605	26.1681	-81.1396	26.2484	-80.8234	mPWP	140000000000	291.56	296.269	304.681	0.000729167	0.00109984	0.00222093	5.20834e-15	1.24438e+08
bivalve	Chionopsis	cribraria	Veneridae	extinct	33.093	30.387	33.093	0.304244	27.3666	-82.451	27.4507	-82.1314	mPWP	140000000000	294.79	296.364	305.185	0.00250878	0.00287388	0.0059961	1.79198e-14	3.22511e+08
bivalve	Codakia	orbicularis	Lucinidae	extant	52.692	45.962	52.692	1.1999	25.0493	-80.4474	NA	NA	PI	140000000000	290.91	296.349	303.577	0.00499178	0.00803257	0.0147218	3.56556e-14	9.02585e+08
bivalve	Codakia	orbicularis	Lucinidae	extant	53.97	48.754	53.97	1.2878	9.34285	-79.8718	NA	NA	LIG	140000000000	284.706	301.618	305.644	0.00299208	0.0132113	0.0183626	2.1372e-14	9.51734e+08
bivalve	Codakia	orbicularis	Lucinidae	extant	57.194	54.883	57.194	1.52821	26.7885	-81.3118	NA	NA	LGM	140000000000	289.022	293.919	300.325	0.00505239	0.00780345	0.0134876	3.60885e-14	1.0821e+09
bivalve	Codakia	orbicularis	Lucinidae	extant	51.828	58.454	58.454	1.62968	19.9193	-75.1388	NA	NA	LGM	140000000000	275.618	298.568	301.344	0.00149072	0.0122102	0.0154087	1.0648e-14	1.13555e+09
bivalve	Codakia	orbicularis	Lucinidae	extant	58.837	52.046	58.837	1.66138	26.6831	-80.7247	NA	NA	LIG	140000000000	289.903	292.696	303.231	0.00582298	0.00746323	0.0182663	4.15927e-14	1.15207e+09
bivalve	Costaglycymeris	subovata	Glycymerididae	extinct	36.183	34.985	36.183	0.395903	27.3041	-81.025	27.384	-80.7045	mPWP	130000000000	293.689	296.119	304.281	0.00257886	0.00318362	0.00630323	1.98374e-14	3.64867e+08
bivalve	Costaglycymeris	subovata	Glycymerididae	extinct	52.038	51.769	52.038	1.1565	30.4642	-84.9871	30.5556	-84.6579	mPWP	130000000000	289.525	293.397	304.471	0.00398289	0.00561675	0.0143037	3.06376e-14	8.15272e+08
bivalve	Crassinella	lunulata	Crassatellidae	extant	5.65	5.31	5.65	0.00165403	27.693	-82.4952	NA	NA	LGM	140000000000	288.525	289.712	299.478	2.87716e-05	3.20211e-05	7.48288e-05	2.05511e-16	6445268
bivalve	Crassinella	lunulata	Crassatellidae	extant	4.233	3.791	4.233	0.000705687	19.9236	-75.1406	NA	NA	LGM	140000000000	275.618	298.568	301.344	4.47485e-06	3.66525e-05	4.62539e-05	3.19632e-17	3.40869e+06
bivalve	Crassinella	lunulata	Crassatellidae	extant	4.395	3.766	4.395	0.000788367	19.9352	-75.1245	NA	NA	LGM	140000000000	275.618	298.568	301.344	4.86257e-06	3.98283e-05	5.02615e-05	3.47327e-17	3.70403e+06
bivalve	Crassinella	lunulata	Crassatellidae	extant	9.242	8.158	9.242	0.00706333	26.6595	-80.6765	NA	NA	LIG	140000000000	289.903	292.696	303.231	9.69506e-05	0.00012426	0.000304127	6.92505e-16	1.91816e+07
bivalve	Crassostrea	virginica	Ostreidae	extant	36.875	53.984	53.984	1.28879	41.6479	-69.9868	NA	NA	PI	130000000000	282.983	283.695	296.467	0.00236584	0.0025296	0.00794968	1.81988e-14	8.84259e+08
bivalve	Crassostrea	virginica	Ostreidae	extant	36.527	83.981	83.981	4.74607	28.048	-80.5475	NA	NA	LGM	130000000000	280.562	289.884	301.145	0.00499752	0.011861	0.0313738	3.84425e-14	2.35068e+09
bivalve	Crassostrea	virginica	Ostreidae	extant	56.544	99.417	99.417	7.80744	26.787	-81.187	NA	NA	LGM	130000000000	289.022	293.919	300.325	0.0159425	0.0246233	0.0425593	1.22634e-13	3.41448e+09
bivalve	Crassostrea	virginica	Ostreidae	extant	52.001	100.22	100.22	7.99494	40.6479	-73.9507	NA	NA	LGM	130000000000	275.707	278.927	286.482	0.00460321	0.00631265	0.0128767	3.54093e-14	3.4758e+09
bivalve	Crassostrea	virginica	Ostreidae	extant	57.447	109.309	109.309	10.3284	41.3214	-72.6929	NA	NA	PI	130000000000	282.129	283.436	297.044	0.0103961	0.01176	0.0397832	7.99697e-14	4.21182e+09
bivalve	Ctena	orbiculata	Lucinidae	extant	18.32	17.846	18.32	0.0531655	26.7156	-80.6957	NA	NA	LIG	140000000000	289.903	292.696	303.231	0.000440571	0.000564673	0.00138204	3.14694e-15	8.71667e+07
bivalve	Ctena	orbiculata	Lucinidae	extant	21.909	20.031	21.909	0.0901232	19.972	-75.1395	NA	NA	LGM	140000000000	275.618	298.568	301.344	0.000169999	0.00139243	0.00175718	1.21428e-15	1.29496e+08
bivalve	Ctenoides	floridana	Limidae	extinct	31.759	39.719	39.719	0.521249	27.3708	-82.4053	27.4548	-82.0856	mPWP	130000000000	294.79	296.364	305.185	0.00348855	0.00399624	0.0083378	2.6835e-14	4.48464e+08
bivalve	Ctenoides	mitis	Limidae	extant	54.2	42.5	54.2	1.30406	24.6699	-81.2546	NA	NA	PI	130000000000	289.236	298.119	304.399	0.00424661	0.00923446	0.0155606	3.26662e-14	8.92107e+08
bivalve	Ctenoides	scabra	Limidae	extant	41.446	51.586	51.586	1.12712	19.972	-75.1395	NA	NA	LGM	130000000000	275.618	298.568	301.344	0.00104981	0.00859879	0.0108513	8.07548e-15	7.99687e+08
bivalve	Ctenoides	scabra	Limidae	extant	46.278	59.829	59.829	1.74538	26.6595	-80.6765	NA	NA	LIG	130000000000	289.903	292.696	303.231	0.00561082	0.0071913	0.0176007	4.31601e-14	1.1101e+09
bivalve	Ctenoides	scabra	Limidae	extant	52.931	83.578	83.578	4.6792	26.6595	-80.6765	NA	NA	LIG	130000000000	289.903	292.696	303.231	0.0117554	0.0150667	0.0368759	9.04261e-14	2.3258e+09
bivalve	Cumingia	tellinoides	Semelidae	extant	10.135	6.63	10.135	0.00927214	26.7935	-81.3363	NA	NA	LIG	140000000000	289.903	292.696	303.231	0.000118899	0.000152391	0.000372978	8.49279e-16	2.35241e+07
bivalve	Cumingia	tellinoides	Semelidae	extant	16.193	10.609	16.193	0.0369416	24.8653	-80.7145	NA	NA	PI	140000000000	289.236	298.119	304.399	0.000315784	0.000686688	0.00115711	2.2556e-15	6.63384e+07
bivalve	Cumingia	tellinoides	Semelidae	extant	16.9	12.3	16.9	0.041905	41.57	-71.0735	NA	NA	PI	140000000000	283.274	284.601	297.585	0.000200513	0.000227018	0.000721245	1.43223e-15	7.29168e+07
bivalve	Cyclocardia	granulata	Carditidae	extinct	11.917	13.255	13.255	0.0204654	34.2385	-79.8424	34.3148	-79.493	mPWP	140000000000	293.133	292.332	303.809	0.000286777	0.000267258	0.000708144	2.04841e-15	4.25984e+07
bivalve	Cyclocardia	granulata	Carditidae	extinct	13.245	14.555	14.555	0.0269703	30.4447	-85.1858	30.5367	-84.8569	mPWP	140000000000	289.525	293.397	304.471	0.00025597	0.000360973	0.000919262	1.82835e-15	5.23953e+07
bivalve	Cyclocardia	granulata	Carditidae	extinct	24.547	27.525	27.525	0.176683	29.6873	-81.5215	29.7687	-81.1923	mPWP	140000000000	290.502	295.908	304.622	0.00114412	0.00183842	0.00381064	8.17231e-15	2.14548e+08
bivalve	Cymatoica	marcottae	Tellinidae	extinct	17.71	10.287	17.71	0.048111	27.3069	-81.0192	27.3868	-80.6988	mPWP	140000000000	293.689	296.119	304.281	0.000571617	0.000705664	0.00139714	4.08298e-15	8.08744e+07
bivalve	Dallocardia	muricata	Cardiidae	extinct	18.244	18.023	18.244	0.0525175	26.653	-80.8294	NA	NA	LIG	140000000000	289.903	292.696	303.231	0.000436538	0.000559504	0.00136939	3.11813e-15	8.63686e+07
bivalve	Dallocardia	muricata	Cardiidae	extinct	30.187	34.91	34.91	0.356207	19.972	-75.1395	NA	NA	LGM	140000000000	275.618	298.568	301.344	0.000476537	0.00390321	0.00492568	3.40384e-15	3.62999e+08
bivalve	Dallocardia	muricata	Cardiidae	extinct	34.404	37.862	37.862	0.452585	19.9352	-75.1245	NA	NA	LGM	140000000000	275.618	298.568	301.344	0.000570289	0.00467111	0.00589473	4.07349e-15	4.34413e+08
bivalve	Dallocardia	muricata	Cardiidae	extinct	36.088	38.802	38.802	0.486541	26.7135	-80.3686	NA	NA	LGM	140000000000	288.035	293.204	300.477	0.0019583	0.0031068	0.00578955	1.39878e-14	4.58635e+08
bivalve	Dendostrea	frons	Ostreidae	extant	15.29	23.923	23.923	0.116817	27.3803	-82.3779	27.4642	-82.0581	mPWP	130000000000	294.79	296.364	305.185	0.00113629	0.00130166	0.0027158	8.74072e-15	1.46074e+08
bivalve	Dendostrea	frons	Ostreidae	extant	28.725	49.438	49.438	0.994213	19.972	-75.1395	NA	NA	LGM	130000000000	275.618	298.568	301.344	0.000955531	0.00782654	0.00987674	7.35024e-15	7.27869e+08
bivalve	Dinocardium	robustum	Cardiidae	extant	91.573	94.919	94.919	6.8107	27.3666	-82.451	27.4507	-82.1314	mPWP	140000000000	294.79	296.364	305.185	0.025819	0.0295765	0.0617086	1.84422e-13	3.31911e+09
bivalve	Dinocardium	robustum	Cardiidae	extant	NA	95.523	95.523	6.93934	27.7896	-81.1948	27.87	-80.8726	mPWP	140000000000	291.807	295.756	304.508	0.0201596	0.0284674	0.0592343	1.43997e-13	3.36602e+09
bivalve	Dinocardium	robustum	Cardiidae	extant	98.023	103.68	103.68	8.83691	27.7009	-82.4914	NA	NA	LGM	140000000000	288.525	289.712	299.478	0.0180126	0.020047	0.0468469	1.28661e-13	4.03509e+09
bivalve	Divalinga	quadrisulcata	Lucinidae	extant	8.807	8.834	8.834	0.0061825	29.8759	-81.3509	NA	NA	LGM	140000000000	282.912	290.284	300.827	4.61354e-05	9.07777e-05	0.00022561	3.29539e-16	1.73581e+07
bivalve	Divalinga	quadrisulcata	Lucinidae	extant	20.777	19.694	20.777	0.0770672	27.2755	-81.0015	27.3553	-80.6811	mPWP	140000000000	293.689	296.119	304.281	0.000813905	0.00100477	0.00198934	5.81361e-15	1.15154e+08
bivalve	Dosinia	discus	Veneridae	extant	59.897	55.73	59.897	1.75124	28.0406	-82.6761	NA	NA	LGM	140000000000	288.525	289.712	299.478	0.00535007	0.00595432	0.0139144	3.82148e-14	1.1985e+09
bivalve	Dosinia	discus	Veneridae	extant	70.417	64.375	70.417	2.8226	27.3389	-82.5309	27.4232	-82.2114	mPWP	140000000000	294.79	296.364	305.185	0.0133362	0.015277	0.0318742	9.52586e-14	1.71441e+09
bivalve	Dosinia	discus	Veneridae	extant	83.471	79.043	83.471	4.66155	29.2296	-81.1091	NA	NA	LGM	140000000000	282.912	290.284	300.827	0.00663833	0.0130618	0.0324625	4.74166e-14	2.49762e+09
bivalve	Dosinia	elegans	Veneridae	extant	55.497	50.96	55.497	1.39828	28.0406	-82.6761	NA	NA	LGM	140000000000	288.525	289.712	299.478	0.00451905	0.00502944	0.0117531	3.22789e-14	1.01234e+09
bivalve	Dosinia	elegans	Veneridae	extant	87.243	82.151	87.243	5.31074	33.7619	-78.8219	NA	NA	LIG	140000000000	288.516	288.913	302.959	0.0122842	0.0127335	0.0427041	8.77441e-14	2.75419e+09
bivalve	Eucrassatella	meridionalis	Crassatellidae	extinct	58.987	43.954	58.987	1.67391	30.4642	-84.9871	30.5556	-84.6579	mPWP	140000000000	289.525	293.397	304.471	0.00566008	0.00798194	0.020327	4.04291e-14	1.15858e+09
bivalve	Eucrassatella	meridionalis	Crassatellidae	extinct	66.748	49.396	66.748	2.41042	30.4642	-84.9871	30.5556	-84.6579	mPWP	140000000000	289.525	293.397	304.471	0.00744036	0.0104925	0.0267205	5.31454e-14	1.52299e+09
bivalve	Eucrassatella	meridionalis	Crassatellidae	extinct	67.456	47.33	67.456	2.48663	30.3866	-84.646	30.477	-84.3168	mPWP	140000000000	289.525	293.397	304.471	0.00761609	0.0107403	0.0273516	5.44006e-14	1.55896e+09
bivalve	Eucrassatella	meridionalis	Crassatellidae	extinct	96.916	70.057	96.916	7.24214	27.3666	-82.451	27.4507	-82.1314	mPWP	140000000000	294.79	296.364	305.185	0.0270362	0.0309708	0.0646178	1.93116e-13	3.47559e+09
bivalve	Eucrassatella	speciosa	Crassatellidae	extant	50.835	35.105	50.835	1.07939	26.7135	-80.3686	NA	NA	LGM	140000000000	288.035	293.204	300.477	0.00355979	0.00564753	0.0105242	2.54271e-14	8.33707e+08
bivalve	Eucrassatella	speciosa	Crassatellidae	extant	60.793	39.796	60.793	1.82965	27.3666	-82.451	27.4507	-82.1314	mPWP	140000000000	294.79	296.364	305.185	0.00963434	0.0110364	0.0230265	6.88167e-14	1.23852e+09
bivalve	Eurytellina	alternata	Tellinidae	extant	45.109	28.351	45.109	0.758711	27.7009	-82.4914	NA	NA	LGM	140000000000	288.525	289.712	299.478	0.00285699	0.00317966	0.00743042	2.0407e-14	6.40008e+08
bivalve	Euvola	hemicyclica	Pectinidae	extinct	75.96	72.388	75.96	3.5296	26.9129	-82.3092	26.9966	-81.9911	mPWP	130000000000	294.79	296.364	305.185	0.0146438	0.016775	0.0349995	1.12645e-13	1.88251e+09
bivalve	Glans	dominguensis	Carditidae	extant	6.295	5.468	6.295	0.00227529	26.7462	-81.4771	NA	NA	LGM	140000000000	289.022	293.919	300.325	3.82945e-05	5.91461e-05	0.000102229	2.73532e-16	8.20173e+06
bivalve	Globivenus	rigida	Veneridae	extant	77.309	77.994	77.994	3.81576	26.7917	-81.1448	NA	NA	LIG	140000000000	289.903	292.696	303.231	0.0108637	0.0139239	0.0340788	7.75981e-14	2.14938e+09
bivalve	Glycymeris	aberrans	Glycymerididae	extinct	60.981	52.365	60.981	1.84639	25.726	-80.4281	25.8041	-80.1131	mPWP	130000000000	290.918	296.981	306.277	0.00640863	0.0108788	0.0235103	4.92971e-14	1.15794e+09
bivalve	Glycymeris	americana	Glycymerididae	extant	64.875	59.321	64.875	2.2163	29.6873	-81.5215	29.7687	-81.1923	mPWP	130000000000	290.502	295.908	304.622	0.0070813	0.0113785	0.0235851	5.44715e-14	1.3279e+09
bivalve	Glycymeris	americana	Glycymerididae	extant	83.471	79.351	83.471	4.66155	27.693	-82.4952	NA	NA	LIG	130000000000	289.405	291.798	304.039	0.0112093	0.0138791	0.0392846	8.6225e-14	2.31921e+09
bivalve	Glycymeris	decussata	Glycymerididae	extant	16.582	15.937	16.582	0.0396213	29.8759	-81.3509	NA	NA	LGM	130000000000	282.912	290.284	300.827	0.000172553	0.000339522	0.000843813	1.32733e-15	6.49217e+07
bivalve	Glycymeris	decussata	Glycymerididae	extant	25.245	24.056	25.245	0.136904	28.4505	-80.77	NA	NA	LGM	130000000000	280.562	289.884	301.145	0.000349797	0.000830199	0.00219598	2.69075e-15	1.64534e+08
bivalve	Glycymeris	duplinensis	Glycymerididae	extinct	5.895	6.281	6.281	0.0022604	34.8784	-78.075	34.9494	-77.7212	mPWP	130000000000	283.894	295.488	304.638	2.20875e-05	6.2627e-05	0.000134782	1.69904e-16	7.57848e+06
bivalve	Glycymeris	laevis	Glycymerididae	extinct	52.715	53.006	53.006	1.22112	27.3666	-82.451	27.4507	-82.1314	mPWP	130000000000	294.79	296.364	305.185	0.00660587	0.00756723	0.0157883	5.08144e-14	8.49205e+08
bivalve	Glycymeris	quinquerugata	Glycymerididae	extinct	23.177	20	23.177	0.106394	34.2385	-79.8424	34.3148	-79.493	mPWP	130000000000	293.133	292.332	303.809	0.000916817	0.000854415	0.00226391	7.05244e-15	1.36186e+08
bivalve	Gregariella	coralliophaga	Mytilidae	extant	16.156	7.392	16.156	0.0366931	26.6595	-80.6765	NA	NA	LIG	130000000000	289.903	292.696	303.231	0.000309776	0.000397035	0.000971744	2.38289e-15	6.12889e+07
bivalve	Gregariella	coralliophaga	Mytilidae	extant	20.219	9.699	20.219	0.0711199	26.7156	-80.6957	NA	NA	LIG	130000000000	289.903	292.696	303.231	0.000508865	0.000652204	0.00159627	3.91434e-15	1.00678e+08
bivalve	Interchlamys	interlineata	Pectinidae	extinct	50	53.748	53.748	1.27224	26.9129	-82.3092	26.9966	-81.9911	mPWP	130000000000	294.79	296.364	305.185	0.0068122	0.00780359	0.0162815	5.24016e-14	8.75729e+08
bivalve	Laciolina	magna	Tellinidae	extant	120.271	69.862	120.271	13.6922	26.6595	-80.6765	NA	NA	LIG	140000000000	289.903	292.696	303.231	0.0283237	0.036302	0.0888494	2.02312e-13	5.60382e+09
bivalve	Laevicardium	mortoni	Cardiidae	extant	NA	7.749	7.749	0.00420025	26.6595	-80.6765	NA	NA	LIG	140000000000	289.903	292.696	303.231	6.56523e-05	8.41456e-05	0.000205947	4.68945e-16	1.29893e+07
bivalve	Laevicardium	mortoni	Cardiidae	extant	14.698	15.774	15.774	0.0341923	29.8759	-81.3509	NA	NA	LGM	140000000000	282.912	290.284	300.827	0.000166382	0.00032738	0.000813637	1.18845e-15	6.26e+07
bivalve	Laevicardium	mortoni	Cardiidae	extant	27.321	27.902	27.902	0.183918	41.7226	-70.5864	NA	NA	PI	140000000000	283.274	284.601	297.585	0.00060801	0.000688383	0.00218701	4.34293e-15	2.21104e+08
bivalve	Laevicardium	serratum	Cardiidae	extant	28.538	32.661	32.661	0.292676	19.934	-75.125	NA	NA	LGM	140000000000	275.618	298.568	301.344	0.000411254	0.00336849	0.00425088	2.93753e-15	3.1327e+08
bivalve	Laevicardium	serratum	Cardiidae	extant	33.243	33.784	33.784	0.323368	28.4505	-80.77	NA	NA	LGM	140000000000	280.562	289.884	301.145	0.000717731	0.00170344	0.00450582	5.12665e-15	3.37599e+08
bivalve	Laevicardium	serratum	Cardiidae	extant	42.345	50.079	50.079	1.03272	26.6595	-80.6765	NA	NA	LIG	140000000000	289.903	292.696	303.231	0.00407645	0.00522472	0.0127875	2.91175e-14	8.06522e+08
bivalve	Leporimetis	intastriata	Tellinidae	extant	42.421	33.753	42.421	0.632942	26.6595	-80.6765	NA	NA	LIG	140000000000	289.903	292.696	303.231	0.00282369	0.00361908	0.00885771	2.01692e-14	5.58664e+08
bivalve	Leporimetis	intastriata	Tellinidae	extant	45.462	37.904	45.462	0.77636	19.9352	-75.1245	NA	NA	LGM	140000000000	275.618	298.568	301.344	0.000854805	0.00700152	0.00883561	6.10575e-15	6.51142e+08
bivalve	Leporimetis	intastriata	Tellinidae	extant	49.137	38.368	49.137	0.976462	26.6595	-80.6765	NA	NA	LIG	140000000000	289.903	292.696	303.231	0.00390872	0.00500975	0.0122614	2.79195e-14	7.73338e+08
bivalve	Leporimetis	magnoliana	Tellinidae	extinct	80.821	66.873	80.821	4.23835	27.3666	-82.451	27.4507	-82.1314	mPWP	140000000000	294.79	296.364	305.185	0.0180902	0.0207229	0.0432364	1.29216e-13	2.32555e+09
bivalve	Leptopecten	irremotis	Pectinidae	extinct	21.789	22.215	22.215	0.0938873	27.3666	-82.451	27.4507	-82.1314	mPWP	130000000000	294.79	296.364	305.185	0.000964531	0.0011049	0.00230527	7.41947e-15	1.23993e+08
bivalve	Limaria	caloosana	Limidae	extinct	45.443	50.756	50.756	1.07445	27.3666	-82.451	27.4507	-82.1314	mPWP	130000000000	294.79	296.364	305.185	0.00600139	0.00687478	0.0143436	4.61645e-14	7.71497e+08
bivalve	Limaria	carolinensis	Limidae	extant	29.739	34.72	34.72	0.350518	30.3866	-84.646	30.477	-84.3168	mPWP	130000000000	289.525	293.397	304.471	0.00162694	0.00229434	0.00584282	1.25149e-14	3.33024e+08
bivalve	Lindapecten	muscosus	Pectinidae	extant	16.691	18.058	18.058	0.0509537	19.9352	-75.1245	NA	NA	LGM	130000000000	275.618	298.568	301.344	0.000102924	0.000843028	0.00106386	7.91724e-16	7.84016e+07
bivalve	Lindapecten	muscosus	Pectinidae	extant	30.323	31.542	31.542	0.264073	26.6595	-80.6765	NA	NA	LIG	130000000000	289.903	292.696	303.231	0.00136114	0.00174455	0.00426979	1.04703e-14	2.693e+08
bivalve	Lirophora	latilirata	Veneridae	extant	7.203	5.659	7.203	0.00338583	29.8759	-81.3509	NA	NA	LGM	140000000000	282.912	290.284	300.827	2.93704e-05	5.77903e-05	0.000143626	2.09789e-16	1.10504e+07
bivalve	Lirophora	latilirata	Veneridae	extant	25.127	20.63	25.127	0.135025	27.3612	-82.4347	27.4453	-82.1151	mPWP	140000000000	294.79	296.364	305.185	0.00136413	0.00156266	0.00326034	9.7438e-15	1.75363e+08
bivalve	Lirophora	latilirata	Veneridae	extant	29.953	26.479	29.953	0.226725	27.3583	-82.4615	27.4424	-82.1419	mPWP	140000000000	294.79	296.364	305.185	0.0020122	0.00230503	0.00480924	1.43728e-14	2.58674e+08
bivalve	Lirophora	latilirata	Veneridae	extant	33.519	31.111	33.519	0.315943	27.3389	-82.5309	27.4232	-82.2114	mPWP	140000000000	294.79	296.364	305.185	0.00258079	0.00295637	0.0061682	1.84342e-14	3.31768e+08
bivalve	Lithophaga	antillarum	Mytilidae	extant	97.905	28.274	97.905	7.46233	19.9618	-75.1269	NA	NA	LGM	130000000000	275.618	298.568	301.344	0.00433302	0.0354908	0.0447878	3.33309e-14	3.30065e+09
bivalve	Lucina	pensylvanica	Lucinidae	extant	34.227	33.734	34.227	0.336038	27.693	-82.4952	NA	NA	LGM	140000000000	288.525	289.712	299.478	0.00155111	0.00172629	0.00403411	1.10793e-14	3.47472e+08
bivalve	Lucina	pensylvanica	Lucinidae	extant	36.77	39.06	39.06	0.496147	19.934	-75.125	NA	NA	LGM	140000000000	275.618	298.568	301.344	0.000610981	0.00500441	0.00631534	4.36415e-15	4.6541e+08
bivalve	Lucina	pensylvanica	Lucinidae	extant	40.619	43.918	43.918	0.701125	27.3389	-82.5309	27.4232	-82.2114	mPWP	140000000000	294.79	296.364	305.185	0.00469237	0.00537526	0.011215	3.35169e-14	6.03218e+08
bivalve	Lucinisca	nassula	Lucinidae	extant	7.811	7.874	7.874	0.00440328	28.0406	-82.6761	NA	NA	LGM	140000000000	288.525	289.712	299.478	6.00735e-05	6.68583e-05	0.000156239	4.29097e-16	1.34574e+07
bivalve	Lunarca	ovalis	Arcidae	extant	11.848	10.756	11.848	0.0146978	29.8759	-81.3509	NA	NA	LGM	130000000000	282.912	290.284	300.827	8.20192e-05	0.000161384	0.000401088	6.30917e-16	3.08591e+07
bivalve	Lunarca	ovalis	Arcidae	extant	40.995	32.044	40.995	0.572211	34.9821	-76.9453	NA	NA	LGM	130000000000	279.025	286.43	295.106	0.000881812	0.00177331	0.00384529	6.78317e-15	4.80962e+08
bivalve	Macoma	arctata	Tellinidae	extinct	29.895	19.775	29.895	0.225432	30.3866	-84.646	30.477	-84.3168	mPWP	140000000000	289.525	293.397	304.471	0.0012583	0.00177448	0.00451894	8.98789e-15	2.57567e+08
bivalve	Macoma	constricta	Tellinidae	extant	36.814	26.255	36.814	0.416618	26.6595	-80.6765	NA	NA	LIG	140000000000	289.903	292.696	303.231	0.00206346	0.00264471	0.00647295	1.4739e-14	4.08255e+08
bivalve	Macoma	constricta	Tellinidae	extant	39.715	27.902	39.715	0.521094	27.4472	-82.6041	NA	NA	LGM	140000000000	289.403	293.421	300.888	0.00233334	0.00333373	0.00630796	1.66667e-14	4.82853e+08
bivalve	Macrocallista	maculata	Veneridae	extant	41.888	33.147	41.888	0.609768	27.3389	-82.5309	27.4232	-82.2114	mPWP	140000000000	294.79	296.364	305.185	0.0042259	0.0048409	0.0101001	3.0185e-14	5.43252e+08
bivalve	Macrocallista	maculata	Veneridae	extant	48.69	37.953	48.69	0.95049	26.6831	-80.7247	NA	NA	LIG	140000000000	289.903	292.696	303.231	0.00383049	0.00490948	0.012016	2.73606e-14	7.5786e+08
bivalve	Macrocallista	nimbosa	Veneridae	extant	118.289	61.917	118.289	13.0372	28.0406	-82.6761	NA	NA	LGM	140000000000	288.525	289.712	299.478	0.0241124	0.0268357	0.0627112	1.72231e-13	5.40154e+09
bivalve	Macrocallista	nimbosa	Veneridae	extant	135.323	73.71	135.323	19.3886	27.3389	-82.5309	27.4232	-82.2114	mPWP	140000000000	294.79	296.364	305.185	0.0565855	0.0648205	0.135242	4.04182e-13	7.27424e+09
bivalve	Mercenaria	campechiensis	Veneridae	extant	92.653	74.898	92.653	6.34214	27.3389	-82.5309	27.4232	-82.2114	mPWP	140000000000	294.79	296.364	305.185	0.024475	0.0280368	0.0584963	1.74821e-13	3.14633e+09
bivalve	Mercenaria	campechiensis	Veneridae	extant	103.975	88.987	103.975	8.91129	29.8759	-81.3509	NA	NA	LGM	140000000000	282.912	290.284	300.827	0.0107924	0.0212354	0.0527764	7.70883e-14	4.06054e+09
bivalve	Mercenaria	campechiensis	Veneridae	extant	127.466	119.294	127.466	16.2522	25.726	-80.4281	25.8041	-80.1131	mPWP	140000000000	290.918	296.981	306.277	0.0352689	0.05987	0.129385	2.51921e-13	6.37255e+09
bivalve	Merisca	aequistriata	Tellinidae	extant	15.484	12.299	15.484	0.0323709	27.0117	-81.0316	27.0916	-80.7122	mPWP	140000000000	293.689	296.119	304.281	0.000424656	0.00052424	0.00103794	3.03326e-15	6.0082e+07
bivalve	Merisca	aequistriata	Tellinidae	extant	17.135	13.445	17.135	0.0436474	29.8759	-81.3509	NA	NA	LGM	140000000000	282.912	290.284	300.827	0.000199816	0.000393165	0.000977132	1.42726e-15	7.5179e+07
bivalve	Miltha	caloosaensis	Lucinidae	extinct	59.818	65.901	65.901	2.3213	27.3666	-82.451	27.4507	-82.1314	mPWP	140000000000	294.79	296.364	305.185	0.0115171	0.0131932	0.0275265	8.22652e-14	1.48056e+09
bivalve	Miltha	caloosaensis	Lucinidae	extinct	62.522	71.947	71.947	3.00737	27.3389	-82.5309	27.4232	-82.2114	mPWP	140000000000	294.79	296.364	305.185	0.0139858	0.0160211	0.0334266	9.98983e-14	1.79791e+09
bivalve	Miltha	carmenae	Lucinidae	extinct	83.36	87.068	87.068	5.27938	26.6595	-80.6765	NA	NA	LIG	140000000000	289.903	292.696	303.231	0.013859	0.0177628	0.0434746	9.89926e-14	2.74199e+09
bivalve	Modiolus	gigas	Mytilidae	extinct	50.587	94.374	94.374	6.69598	30.3866	-84.646	30.477	-84.3168	mPWP	130000000000	289.525	293.397	304.471	0.0148662	0.0209646	0.0533889	1.14355e-13	3.04302e+09
bivalve	Modiolus	gigas	Mytilidae	extinct	95.792	47.807	95.792	6.99715	36.9019	-76.5743	36.9684	-76.2098	mPWP	130000000000	289.11	287.771	299.556	0.0148019	0.0131104	0.036754	1.13861e-13	3.1451e+09
bivalve	Nodipecten	collierensis	Pectinidae	extinct	126.146	121.055	126.146	15.7607	26.07	-81.4279	26.1511	-81.1123	mPWP	130000000000	291.56	296.269	304.681	0.0338845	0.0511098	0.103207	2.6065e-13	5.78264e+09
bivalve	Ostrea	compressirostra	Ostreidae	extinct	67.113	76.23	76.23	3.56674	30.3866	-84.646	30.477	-84.3168	mPWP	130000000000	289.525	293.397	304.471	0.00926922	0.0130716	0.0332885	7.13017e-14	1.89735e+09
bivalve	Ostrea	coxi	Ostreidae	extinct	21.373	38.066	38.066	0.459817	27.3666	-82.451	27.4507	-82.1314	mPWP	130000000000	294.79	296.364	305.185	0.00317541	0.00363753	0.00758938	2.44262e-14	4.08209e+08
bivalve	Ostrea	equestris	Ostreidae	extant	27.73	36.986	36.986	0.422387	25.7926	-80.4372	NA	NA	LIG	130000000000	286.859	293.322	304.638	0.00146903	0.00262146	0.00681182	1.13002e-14	3.83024e+08
bivalve	Ostrea	equestris	Ostreidae	extant	39.342	49.43	49.43	0.993739	27.7009	-82.4914	NA	NA	LGM	130000000000	288.525	289.712	299.478	0.00324803	0.00361487	0.00844745	2.49849e-14	7.27608e+08
bivalve	Ostrea	greeni	Ostreidae	extinct	37.051	51.845	51.845	1.14389	26.9129	-82.3092	26.9966	-81.9911	mPWP	130000000000	294.79	296.364	305.185	0.00628999	0.00720538	0.0150334	4.83846e-14	8.08598e+08
bivalve	Ostrea	lawrencei	Ostreidae	extinct	23.632	30.224	30.224	0.23283	35.4614	-76.9182	35.5289	-76.5608	mPWP	130000000000	284.106	288.923	301.248	0.000728464	0.00113387	0.00329837	5.60357e-15	2.45032e+08
bivalve	Ostrea	lawrencei	Ostreidae	extinct	33.184	36.542	36.542	0.407603	35.4614	-76.9182	35.5289	-76.5608	mPWP	130000000000	284.106	288.923	301.248	0.00110868	0.00172568	0.00501993	8.52833e-15	3.72925e+08
bivalve	Ostrea	lawrencei	Ostreidae	extinct	33.521	38.548	38.548	0.477206	35.4614	-76.9182	35.5289	-76.5608	mPWP	130000000000	284.106	288.923	301.248	0.00124784	0.00194228	0.00565001	9.59876e-15	4.19733e+08
bivalve	Ostrea	lawrencei	Ostreidae	extinct	27.654	40.56	40.56	0.554484	35.4614	-76.9182	35.5289	-76.5608	mPWP	130000000000	284.106	288.923	301.248	0.00139652	0.0021737	0.00632319	1.07424e-14	4.69743e+08
bivalve	Ostrea	sculpturata	Ostreidae	extinct	43.297	53.277	53.277	1.23963	26.6595	-80.6765	NA	NA	LIG	130000000000	289.903	292.696	303.231	0.00434088	0.00556365	0.0136171	3.33914e-14	8.58841e+08
bivalve	Ostrea	sculpturata	Ostreidae	extinct	60.793	70.892	70.892	2.87913	27.2017	-80.883	NA	NA	LIG	130000000000	289.903	292.696	303.231	0.00816686	0.0104673	0.0256189	6.2822e-14	1.61581e+09
bivalve	Panchione	ulocyma	Veneridae	extinct	31.839	25.302	31.839	0.271475	27.3666	-82.451	27.4507	-82.1314	mPWP	140000000000	294.79	296.364	305.185	0.00230326	0.00263846	0.0055049	1.64519e-14	2.96091e+08
bivalve	Panchione	ulocyma	Veneridae	extinct	40.617	29.724	40.617	0.556786	30.388	-84.6462	30.4785	-84.317	mPWP	140000000000	289.525	293.397	304.471	0.00247908	0.00349604	0.0089031	1.77077e-14	5.07451e+08
bivalve	Panchione	ulocyma	Veneridae	extinct	43.228	30.517	43.228	0.669125	30.388	-84.6462	30.4785	-84.317	mPWP	140000000000	289.525	293.397	304.471	0.00284547	0.00401274	0.0102189	2.03248e-14	5.8245e+08
bivalve	Papyridea	lata	Cardiidae	extant	25	20	25	0.133022	26.7733	-80.0472	NA	NA	PI	140000000000	284.69	293.398	301.743	0.000544337	0.00119484	0.00243211	3.88812e-15	1.73409e+08
bivalve	Parvilucina	crenella	Lucinidae	extant	8.39	8.532	8.532	0.00557956	34.2385	-79.8424	34.3148	-79.493	mPWP	140000000000	293.133	292.332	303.809	0.000108201	0.000100836	0.000267181	7.72861e-16	1.60723e+07
bivalve	Perna	conradiana	Mytilidae	extinct	38.975	88.969	88.969	5.62671	27.3803	-82.3779	27.4642	-82.0581	mPWP	130000000000	294.79	296.364	305.185	0.0207755	0.023799	0.0496544	1.59812e-13	2.67075e+09
bivalve	Perna	conradiana	Mytilidae	extinct	46.756	115.013	115.013	12.0006	27.3803	-82.3779	27.4642	-82.0581	mPWP	130000000000	294.79	296.364	305.185	0.036666	0.042002	0.0876335	2.82046e-13	4.71353e+09
bivalve	Perna	conradiana	Mytilidae	extinct	56.159	125.256	125.256	15.435	27.3803	-82.3779	27.4642	-82.0581	mPWP	130000000000	294.79	296.364	305.185	0.0442833	0.0507279	0.105839	3.40641e-13	5.69276e+09
bivalve	Petricolaria	pholadiformis	Veneridae	extant	29.73	14.212	29.73	0.221781	27.3666	-82.451	27.4507	-82.1314	mPWP	140000000000	294.79	296.364	305.185	0.0019792	0.00226723	0.00473037	1.41371e-14	2.54432e+08
bivalve	Petricolaria	pholadiformis	Veneridae	extant	31.316	9.089	31.316	0.25853	30.0525	-89.958	NA	NA	PI	140000000000	282.734	292.043	302.624	0.000746018	0.00174563	0.00430558	5.3287e-15	2.85438e+08
bivalve	Phacoides	pectinatus	Lucinidae	extant	45.664	42.391	45.664	0.78658	29.8759	-81.3509	NA	NA	LGM	140000000000	282.912	290.284	300.827	0.00174771	0.00343885	0.00854657	1.24836e-14	6.5756e+08
bivalve	Pinna	caloosaensis	Pinnidae	extinct	31.058	77.58	77.58	3.75631	27.3666	-82.451	27.4507	-82.1314	mPWP	130000000000	294.79	296.364	305.185	0.0153438	0.0175768	0.0366724	1.18029e-13	1.97249e+09
bivalve	Pinna	caloosaensis	Pinnidae	extinct	43.354	137.424	137.424	20.2901	27.0703	-81.8586	27.1527	-81.5396	mPWP	130000000000	293.689	296.119	304.281	0.049397	0.0609808	0.120736	3.79977e-13	6.98887e+09
bivalve	Placunanomia	plicata	Anomiidae	extinct	50.952	58.095	58.095	1.60033	30.3866	-84.646	30.477	-84.3168	mPWP	130000000000	289.525	293.397	304.471	0.00508155	0.00716609	0.0182493	3.90889e-14	1.04016e+09
bivalve	Placunanomia	plicata	Anomiidae	extinct	59.823	61.062	61.062	1.85364	27.3612	-82.4347	27.4453	-82.1151	mPWP	130000000000	294.79	296.364	305.185	0.00903399	0.0103487	0.0215916	6.94922e-14	1.16135e+09
bivalve	Planicardium	acutilaqueatum	Cardiidae	extinct	93.011	103.981	103.981	8.9128	36.9019	-76.5743	36.9684	-76.2098	mPWP	140000000000	289.11	287.771	299.556	0.0191127	0.0169286	0.0474579	1.36519e-13	4.06105e+09
bivalve	Planicardium	virginianum	Cardiidae	extinct	31.059	34.345	34.345	0.339467	30.4642	-84.9871	30.5556	-84.6579	mPWP	140000000000	289.525	293.397	304.471	0.0017105	0.00241217	0.00614289	1.22178e-14	3.50127e+08
bivalve	Pleurolucina	amabilis	Lucinidae	extinct	7.728	9.968	9.968	0.00882864	27.3666	-82.451	27.4507	-82.1314	mPWP	140000000000	294.79	296.364	305.185	0.000176387	0.000202057	0.000421573	1.25991e-15	2.26751e+07
bivalve	Pleuromeris	auroraensis	Carditidae	extinct	5.726	5.984	5.984	0.00195941	33.3515	-80.2296	33.429	-79.8844	mPWP	140000000000	293.307	292.127	303.734	5.01148e-05	4.51744e-05	0.00012114	3.57963e-16	7.33199e+06
bivalve	Pleuromeris	scituloides	Carditidae	extinct	3.818	3.957	3.957	0.000578402	30.4642	-84.9871	30.5556	-84.6579	mPWP	140000000000	289.525	293.397	304.471	1.43449e-05	2.02294e-05	5.15166e-05	1.02463e-16	2.9363e+06
bivalve	Pleuromeris	tridentata	Carditidae	extant	7.28	7.159	7.28	0.00349372	26.9964	-82.1958	27.0798	-81.8773	mPWP	140000000000	294.79	296.364	305.185	8.80059e-05	0.000100813	0.000210338	6.28614e-16	1.13134e+07
bivalve	Pleuromeris	tridentata	Carditidae	extant	7.687	7.908	7.908	0.00445961	29.8759	-81.3509	NA	NA	LGM	140000000000	282.912	290.284	300.827	3.61105e-05	7.10524e-05	0.000176586	2.57932e-16	1.35863e+07
bivalve	Plicatula	hunterae	Plicatulidae	extinct	42.573	41.543	42.573	0.639655	27.3666	-82.451	27.4507	-82.1314	mPWP	130000000000	294.79	296.364	305.185	0.00406743	0.00465937	0.00972136	3.12879e-14	5.22881e+08
bivalve	Plicatula	hunterae	Plicatulidae	extinct	51.275	58.808	58.808	1.65897	27.3666	-82.451	27.4507	-82.1314	mPWP	130000000000	294.79	296.364	305.185	0.00831264	0.00952239	0.0198676	6.39434e-14	1.06862e+09
bivalve	Plicatula	marginata	Plicatulidae	extinct	28.006	27.685	28.006	0.185948	27.2803	-82.445	27.3644	-82.1256	mPWP	130000000000	294.79	296.364	305.185	0.00161029	0.00184464	0.00384867	1.23869e-14	2.07008e+08
bivalve	Pteromeris	abbreviata	Carditidae	extinct	4.798	5.034	5.034	0.00117664	30.3866	-84.646	30.477	-84.3168	mPWP	140000000000	289.525	293.397	304.471	2.44347e-05	3.44582e-05	8.77521e-05	1.74533e-16	5.00162e+06
bivalve	Pteromeris	perplana	Carditidae	extant	5	5.3	5.3	0.00136966	24.6699	-81.354	NA	NA	PI	140000000000	289.236	298.119	304.399	2.66817e-05	5.80206e-05	9.77679e-05	1.90583e-16	5.60515e+06
bivalve	Scissula	similis	Tellinidae	extant	21.434	12.868	21.434	0.0844801	26.7935	-81.3363	NA	NA	LIG	140000000000	289.903	292.696	303.231	0.000623533	0.000799173	0.00195598	4.45381e-15	1.23366e+08
bivalve	Semele	alumensis	Semelidae	extinct	28.927	22.376	28.927	0.204571	30.3866	-84.646	30.477	-84.3168	mPWP	140000000000	289.525	293.397	304.471	0.00116992	0.00164985	0.00420153	8.35659e-15	2.39475e+08
bivalve	Semele	alumensis	Semelidae	extinct	33.432	25.13	33.432	0.31353	30.3866	-84.646	30.477	-84.3168	mPWP	140000000000	289.525	293.397	304.471	0.00161151	0.00227258	0.00578741	1.15108e-14	3.29866e+08
bivalve	Semele	bellastriata	Semelidae	extant	9.4	6.538	9.4	0.00742552	29.0082	-82.6849	NA	NA	LGM	140000000000	286.611	289.451	299.784	7.46607e-05	9.6647e-05	0.000237225	5.33291e-16	1.99147e+07
bivalve	Semele	harveyensis	Semelidae	extinct	53.922	50.471	53.922	1.28443	27.3041	-81.025	27.384	-80.7045	mPWP	140000000000	293.689	296.119	304.281	0.00671358	0.00828794	0.0164093	4.79541e-14	9.49862e+08
bivalve	Semele	perlamellosa	Semelidae	extinct	70.205	49.242	70.205	2.7976	26.6595	-80.6765	NA	NA	LIG	140000000000	289.903	292.696	303.231	0.00860762	0.0110323	0.0270015	6.1483e-14	1.70301e+09
bivalve	Semele	proficua	Semelidae	extant	23.388	21.709	23.388	0.109277	27.7009	-82.4914	NA	NA	LGM	140000000000	288.525	289.712	299.478	0.000667955	0.000743395	0.00173721	4.77111e-15	1.49632e+08
bivalve	Semele	proficua	Semelidae	extant	32.727	30.662	32.727	0.294424	26.6831	-80.7247	NA	NA	LIG	140000000000	289.903	292.696	303.231	0.00159046	0.00203847	0.00498917	1.13604e-14	3.14672e+08
bivalve	Semele	proficua	Semelidae	extant	39.326	34.383	39.326	0.50618	19.9193	-75.1388	NA	NA	LGM	140000000000	275.618	298.568	301.344	0.000620224	0.00508012	0.00641088	4.43017e-15	4.72451e+08
bivalve	Semele	purpurascens	Semelidae	extant	29.837	23.389	29.837	0.224144	26.4724	-80.6089	NA	NA	LIG	140000000000	289.903	292.696	303.231	0.00129625	0.00166139	0.00406625	9.25893e-15	2.56462e+08
bivalve	Spondylus	americanus	Spondylidae	extant	33.856	39.23	39.23	0.502544	26.6595	-80.6765	NA	NA	LIG	130000000000	289.903	292.696	303.231	0.00220541	0.00282664	0.00691822	1.69647e-14	4.36339e+08
bivalve	Spondylus	americanus	Spondylidae	extant	54.852	71.457	71.457	2.94735	26.6595	-80.6765	NA	NA	LIG	130000000000	289.903	292.696	303.231	0.00831157	0.0106528	0.0260728	6.39351e-14	1.64444e+09
bivalve	Spondylus	bostrychites	Spondylidae	extinct	110.68	107.526	110.68	10.7153	27.3666	-82.451	27.4507	-82.1314	mPWP	130000000000	294.79	296.364	305.185	0.0336794	0.0385808	0.0804953	2.59072e-13	4.32959e+09
bivalve	Spondylus	rotundatus	Spondylidae	extinct	48.029	68.175	68.175	2.56563	27.3982	-82.388	27.4821	-82.0682	mPWP	130000000000	294.79	296.364	305.185	0.0115281	0.0132058	0.0275526	8.86775e-14	1.48197e+09
bivalve	Stewartia	floridana	Lucinidae	extant	28.414	28.599	28.599	0.197804	27.293	-81.0072	27.3728	-80.6867	mPWP	140000000000	293.689	296.119	304.281	0.00165043	0.00203747	0.00403397	1.17888e-14	2.33509e+08
bivalve	Stewartia	floridana	Lucinidae	extant	31.234	30.852	31.234	0.256538	29.8759	-81.3509	NA	NA	LGM	140000000000	282.912	290.284	300.827	0.000754267	0.00148412	0.00368849	5.38762e-15	2.83787e+08
bivalve	Strigilla	mirabilis	Tellinidae	extant	10.312	9.552	10.312	0.00975802	27.0117	-81.0316	27.0916	-80.7122	mPWP	140000000000	293.689	296.119	304.281	0.00017276	0.000213273	0.000422258	1.234e-15	2.44427e+07
bivalve	Striostrea	paucichomata	Ostreidae	extinct	41.296	50.076	50.076	1.03254	27.3605	-82.3949	27.4445	-82.0752	mPWP	130000000000	294.79	296.364	305.185	0.00582494	0.00667265	0.0139219	4.48072e-14	7.48814e+08
bivalve	Striostrea	paucichomata	Ostreidae	extinct	44.628	75.582	75.582	3.47804	26.1681	-81.1396	26.2484	-80.8234	mPWP	130000000000	291.56	296.269	304.681	0.0109099	0.0164559	0.0332297	8.3922e-14	1.86185e+09
bivalve	Tellidora	cristata	Tellinidae	extant	29.975	23.163	29.975	0.227216	28.0406	-82.6761	NA	NA	LGM	140000000000	288.525	289.712	299.478	0.00115659	0.00128722	0.00300805	8.26137e-15	2.59094e+08
bivalve	Tellinella	listeri	Tellinidae	extant	58.999	32.075	58.999	1.67491	19.9352	-75.1245	NA	NA	LGM	140000000000	275.618	298.568	301.344	0.00152165	0.0124635	0.0157283	1.08689e-14	1.1591e+09
bivalve	Timoclea	grus	Veneridae	extant	6.784	5.281	6.784	0.00283716	27.3125	-81.025	27.3924	-80.7045	mPWP	140000000000	293.689	296.119	304.281	6.84045e-05	8.44457e-05	0.000167193	4.88603e-16	9.67812e+06
bivalve	Timoclea	grus	Veneridae	extant	10.571	8.828	10.571	0.0104989	29.8759	-81.3509	NA	NA	LGM	140000000000	282.912	290.284	300.827	6.86308e-05	0.00013504	0.000335616	4.9022e-16	2.58218e+07
bivalve	Trachycardium	aclinensis	Cardiidae	extinct	60.256	79.304	79.304	4.00793	27.3666	-82.451	27.4507	-82.1314	mPWP	140000000000	294.79	296.364	305.185	0.0173475	0.0198721	0.0414613	1.23911e-13	2.23007e+09
bivalve	Trachycardium	aclinensis	Cardiidae	extinct	57.864	80.388	80.388	4.17171	27.293	-81.0072	27.3728	-80.6867	mPWP	140000000000	293.689	296.119	304.281	0.0162427	0.0200516	0.0397001	1.16019e-13	2.29807e+09
bivalve	Trachycardium	egmontianum	Cardiidae	extant	NA	52.845	52.845	1.21021	27.1575	-82.379	NA	NA	LGM	140000000000	289.403	293.421	300.888	0.00438972	0.00627176	0.0118672	3.13551e-14	9.08394e+08
bivalve	Trachycardium	egmontianum	Cardiidae	extant	45.398	57.616	57.616	1.56172	27.7009	-82.4914	NA	NA	LGM	140000000000	288.525	289.712	299.478	0.00490967	0.00546418	0.012769	3.50691e-14	1.09984e+09
bivalve	Trachycardium	evergladeensis	Cardiidae	extant	NA	38.442	38.442	0.473345	25.7644	-80.5128	25.8428	-80.1977	mPWP	140000000000	290.918	296.981	306.277	0.00248651	0.00422092	0.00912184	1.77608e-14	4.49274e+08
bivalve	Trachycardium	oedalium	Cardiidae	extinct	47.128	48.473	48.473	0.938047	27.3666	-82.451	27.4507	-82.1314	mPWP	140000000000	294.79	296.364	305.185	0.00583733	0.00668684	0.0139515	4.16952e-14	7.50406e+08
bivalve	Trachycardium	stiriatum	Cardiidae	extinct	30.439	37.368	37.368	0.435386	30.3866	-84.646	30.477	-84.3168	mPWP	140000000000	289.525	293.397	304.471	0.00206148	0.00290714	0.00740339	1.47249e-14	4.21972e+08
bivalve	Trachycardium	stiriatum	Cardiidae	extinct	44.848	52.364	52.364	1.178	30.388	-84.6462	30.4785	-84.317	mPWP	140000000000	289.525	293.397	304.471	0.00434895	0.00613296	0.0156183	3.10639e-14	8.90201e+08
bivalve	Trigoniocardia	willcoxi	Cardiidae	extinct	10.146	10.685	10.685	0.0108364	27.3666	-82.451	27.4507	-82.1314	mPWP	140000000000	294.79	296.364	305.185	0.000205688	0.000235622	0.000491605	1.4692e-15	2.64418e+07
bivalve	Tucetona	pectinata	Glycymerididae	extant	25.951	25.667	25.951	0.14851	25.8178	-80.4209	NA	NA	LIG	130000000000	286.859	293.322	304.638	0.000670757	0.00119695	0.00311026	5.15967e-15	1.74888e+08
bivalve	Undulostrea	locklini	Ostreidae	extinct	40.867	29.434	40.867	0.566956	27.3307	-81.0348	27.4106	-80.7143	mPWP	130000000000	293.689	296.119	304.281	0.00337597	0.00416766	0.00825152	2.5969e-14	4.77645e+08
gastropod	Acantholabia	sarasotaensis	Muricidae	extinct	16.503	31.749	31.749	0.0504406	27.368	-82.4364	27.4521	-82.1167	mPWP	55496000	294.79	296.364	305.185	4.59234e-05	5.26066e-05	0.000109759	8.27448e-13	5.90359e+06
gastropod	Agathotoma	candidissima	Mangeliidae	extant	2.198	5.154	5.154	0.00157986	26.6595	-80.6765	NA	NA	LIG	72343000	289.903	292.696	303.231	2.89599e-06	3.71174e-06	9.08451e-06	4.00551e-14	572969
gastropod	Architectonica	nobilis	Architectonicidae	extant	28.711	15.085	28.711	0.0416454	26.6595	-80.6765	NA	NA	LIG	70361000	289.903	292.696	303.231	3.27762e-05	4.20087e-05	0.000102817	4.65571e-13	6.48474e+06
gastropod	Architectonica	nobilis	Architectonicidae	extant	48.755	27.107	48.755	0.114199	25.8211	-80.4366	NA	NA	LIG	70361000	286.859	293.322	304.638	5.30425e-05	9.46532e-05	0.000245955	7.53444e-13	1.38299e+07
gastropod	Astralium	phoebium	Turbinidae	extant	17.358	12.341	17.358	0.0159673	26.6595	-80.6765	NA	NA	LIG	60451000	289.903	292.696	303.231	1.37566e-05	1.76316e-05	4.31535e-05	2.27382e-13	2.72173e+06
gastropod	Astralium	phoebium	Turbinidae	extant	22.041	12.653	22.041	0.0251675	26.7135	-80.3686	NA	NA	LGM	60451000	288.035	293.204	300.477	1.63387e-05	2.59209e-05	4.8304e-05	2.70061e-13	3.82654e+06
gastropod	Astralium	phoebium	Turbinidae	extant	23.95	18.882	23.95	0.0294823	26.6595	-80.6765	NA	NA	LIG	60451000	289.903	292.696	303.231	2.17664e-05	2.78977e-05	6.82798e-05	3.59776e-13	4.30647e+06
gastropod	Astralium	phoebium	Turbinidae	extant	25.077	16.904	25.077	0.0321814	19.9352	-75.1245	NA	NA	LGM	60451000	275.618	298.568	301.344	6.03725e-06	4.94498e-05	6.24034e-05	9.97892e-14	4.59883e+06
gastropod	Bellaspira	pentagonalis	Drilliidae	extant	5.756	12.599	12.599	0.00867212	26.1681	-81.1396	26.2484	-80.8234	mPWP	72343000	291.56	296.269	304.681	1.20373e-05	1.81564e-05	3.66636e-05	1.6649e-13	2.05425e+06
gastropod	Bostrycapulus	aculeatus	Calyptraeidae	extant	5.909	8.788	8.788	0.00436612	27.693	-82.4952	NA	NA	LGM	67388000	288.525	289.712	299.478	5.1138e-06	5.69136e-06	1.32999e-05	7.58724e-14	1.14557e+06
gastropod	Bulla	occidentalis	Bullidae	extant	6.331	11.739	11.739	0.00757935	29.8759	-81.3509	NA	NA	LGM	97118000	282.912	290.284	300.827	6.62986e-06	1.30452e-05	3.24211e-05	6.82787e-14	2.49443e+06
gastropod	Bulla	occidentalis	Bullidae	extant	13.51	24.04	24.04	0.0296937	27.3389	-82.5309	27.4232	-82.2114	mPWP	97118000	294.79	296.364	305.185	5.40386e-05	6.19029e-05	0.000129155	5.56525e-13	6.94683e+06
gastropod	Bulla	occidentalis	Bullidae	extant	20.71	33.778	33.778	0.0567587	19.9352	-75.1245	NA	NA	LGM	97118000	275.618	298.568	301.344	1.48311e-05	0.000121478	0.0001533	1.5274e-13	1.12975e+07
gastropod	Bulla	occidentalis	Bullidae	extant	58.649	91.242	91.242	0.376839	27.0002	-82.2056	NA	NA	LGM	97118000	289.403	293.421	300.888	0.000225683	0.000322442	0.000610112	2.32423e-12	4.67021e+07
gastropod	Busycon	carica	Buccinidae	extant	45.432	62.69	62.69	0.184352	41.3805	-70.6455	NA	NA	PI	72343000	283.274	284.601	297.585	5.59356e-05	6.33297e-05	0.000201201	7.7366e-13	2.03411e+07
gastropod	Calophos	wilsoni	Nassariidae	extinct	18.554	30.116	30.116	0.0456135	30.4108	-84.5416	30.501	-84.2122	mPWP	117929000	292.238	294.275	304	7.2445e-05	8.66172e-05	0.000196611	6.13941e-13	1.16441e+07
gastropod	Calotrophon	ostrearum	Muricidae	extant	10.644	17.203	17.203	0.0156968	28.0406	-82.6761	NA	NA	LGM	55496000	288.525	289.712	299.478	1.09886e-05	1.22296e-05	2.85789e-05	1.97992e-13	2.4616e+06
gastropod	Calotrophon	ostrearum	Muricidae	extant	13.319	18.908	18.908	0.0187929	26.4724	-80.6089	NA	NA	LIG	55496000	289.903	292.696	303.231	1.42422e-05	1.8254e-05	4.46768e-05	2.56616e-13	2.81781e+06
gastropod	Calotrophon	ostrearum	Muricidae	extant	12.358	21.358	21.358	0.0237027	30.388	-84.6462	30.4785	-84.317	mPWP	55496000	289.525	293.397	304.471	1.63776e-05	2.3096e-05	5.88168e-05	2.95092e-13	3.35239e+06
gastropod	Calyptraea	centralis	Calyptraeidae	extant	29.358	28.349	29.358	0.0434514	27.3307	-81.0348	27.4106	-80.7143	mPWP	67388000	293.689	296.119	304.281	4.53754e-05	5.60161e-05	0.000110906	6.73225e-13	6.41988e+06
gastropod	Cancellaria	reticulata	Cancellariidae	extant	25.126	44.034	44.034	0.0940592	26.6831	-80.7247	NA	NA	LIG	72343000	289.903	292.696	303.231	6.20863e-05	7.95751e-05	0.000194761	8.58732e-13	1.22837e+07
gastropod	Cancellaria	tabulata	Cancellariidae	extinct	21.752	37.299	37.299	0.0685595	27.3666	-82.451	27.4507	-82.1314	mPWP	72343000	294.79	296.364	305.185	7.53875e-05	8.63587e-05	0.00018018	1.0427e-12	9.69129e+06
gastropod	Cassis	floridensis	Cassidae	extinct	112.141	145.367	145.367	0.915129	27.3666	-82.451	27.4507	-82.1314	mPWP	63424000	294.79	296.364	305.185	0.000461444	0.000528598	0.00110287	7.27829e-12	5.932e+07
gastropod	Cassis	madagascariensis	Cassidae	extant	23.594	39.355	39.355	0.0759381	26.6595	-80.6765	NA	NA	LIG	63424000	289.903	292.696	303.231	4.63379e-05	5.93906e-05	0.000145359	7.30881e-13	9.16792e+06
gastropod	Cassis	madagascariensis	Cassidae	extant	30.226	48.792	48.792	0.114364	25.8178	-80.4209	NA	NA	LIG	63424000	286.859	293.322	304.638	4.78202e-05	8.53341e-05	0.000221739	7.54261e-13	1.24683e+07
gastropod	Celatoconus	nux	Buccinidae	extinct	8.454	15.269	15.269	0.0125067	27.3069	-81.0192	27.3868	-80.6988	mPWP	72343000	293.689	296.119	304.281	1.91036e-05	2.35834e-05	4.66927e-05	2.64226e-13	2.70284e+06
gastropod	Cerodrillia	prion	Drilliidae	extinct	4.128	10.442	10.442	0.00606412	30.3876	-84.6454	30.478	-84.3162	mPWP	72343000	289.525	293.397	304.471	7.67165e-06	1.08187e-05	2.75511e-05	1.06109e-13	1.57034e+06
gastropod	Cheilea	equestris	Calyptraeidae	extant	41.67	34.739	41.67	0.0846737	26.4724	-80.6089	NA	NA	LIG	67388000	289.903	292.696	303.231	5.34857e-05	6.85519e-05	0.000167781	7.93557e-13	1.05821e+07
gastropod	Chicoreus	dilectus	Muricidae	extant	11.894	21.41	21.41	0.0238128	26.5005	-80.6803	NA	NA	LIG	55496000	289.903	292.696	303.231	1.69977e-05	2.17858e-05	5.33207e-05	3.06266e-13	3.36299e+06
gastropod	Chicoreus	floridanus	Muricidae	extinct	23.489	32.261	32.261	0.0520015	27.3666	-82.451	27.4507	-82.1314	mPWP	55496000	294.79	296.364	305.185	4.70125e-05	5.38542e-05	0.000112362	8.47072e-13	6.0436e+06
gastropod	Chicoreus	floridanus	Muricidae	extinct	26.821	41.391	41.391	0.083597	30.388	-84.6462	30.4785	-84.317	mPWP	55496000	289.525	293.397	304.471	4.21545e-05	5.9447e-05	0.000151389	7.5954e-13	8.62875e+06
gastropod	Chicoreus	shirleyae	Muricidae	extinct	29.085	42.915	42.915	0.0895582	27.3125	-81.025	27.3924	-80.7045	mPWP	55496000	293.689	296.119	304.281	6.42418e-05	7.93068e-05	0.000157019	1.15751e-12	9.08917e+06
gastropod	Cinctura	rhomboidea	Fasciolariidae	extinct	48.98	100.204	100.204	0.450475	27.3666	-82.451	27.4507	-82.1314	mPWP	72343000	294.79	296.364	305.185	0.00030925	0.000354255	0.000739121	4.27731e-12	3.9755e+07
gastropod	Cinctura	rhomboidea	Fasciolariidae	extinct	53.705	111.311	111.311	0.550351	26.1681	-81.1396	26.2484	-80.8234	mPWP	72343000	291.56	296.269	304.681	0.000270703	0.000408316	0.000824519	3.74417e-12	4.61975e+07
gastropod	Circulus	costulatus	Liotiidae	extinct	23.772	11.078	23.772	0.0290663	34.8784	-78.075	34.9494	-77.7212	mPWP	60451000	283.894	295.488	304.638	1.24233e-05	3.52253e-05	7.58095e-05	2.05345e-13	4.26261e+06
gastropod	Clathrodrillia	anteaphanitoma	Drilliidae	extinct	6.373	13.282	13.282	0.00958963	30.3866	-84.646	30.477	-84.3168	mPWP	72343000	289.525	293.397	304.471	1.08239e-05	1.52641e-05	3.8872e-05	1.49709e-13	2.21559e+06
gastropod	Clathrodrillia	emmonsi	Drilliidae	extinct	2.749	6.635	6.635	0.00255618	30.3876	-84.6454	30.478	-84.3162	mPWP	72343000	289.525	293.397	304.471	4.01989e-06	5.66892e-06	1.44366e-05	5.56002e-14	822845
gastropod	Clathrodrillia	emmonsi	Drilliidae	extinct	3.302	8.935	8.935	0.0045063	30.3876	-84.6454	30.478	-84.3162	mPWP	72343000	289.525	293.397	304.471	6.14705e-06	8.66868e-06	2.20759e-05	8.50214e-14	1.25826e+06
gastropod	Clathrodrillia	gracilina	Drilliidae	extinct	4.051	9.863	9.863	0.00543966	30.3876	-84.6454	30.478	-84.3162	mPWP	72343000	289.525	293.397	304.471	7.07512e-06	9.97745e-06	2.54088e-05	9.78578e-14	1.44823e+06
gastropod	Clathrodrillia	gracilina	Drilliidae	extinct	5.747	14.74	14.74	0.0116943	30.3866	-84.646	30.477	-84.3168	mPWP	72343000	289.525	293.397	304.471	1.25653e-05	1.77198e-05	4.51258e-05	1.73794e-13	2.57204e+06
gastropod	Compsodrillia	drewi	Pseudomelatomidae	extinct	3.554	10.602	10.602	0.00624236	34.8784	-78.075	34.9494	-77.7212	mPWP	72343000	283.894	295.488	304.638	4.67832e-06	1.3265e-05	2.8548e-05	6.47071e-14	1.60519e+06
gastropod	Conus	adversarius	Conidae	extinct	21.246	41.672	41.672	0.0846814	27.3666	-82.451	27.4507	-82.1314	mPWP	72343000	294.79	296.364	305.185	8.83016e-05	0.000101152	0.000211045	1.22132e-12	1.13514e+07
gastropod	Conus	adversarius	Conidae	extinct	23.636	53.476	53.476	0.136184	30.4642	-84.9871	30.5556	-84.6579	mPWP	72343000	289.525	293.397	304.471	7.91826e-05	0.000111665	0.000284368	1.0952e-12	1.62082e+07
gastropod	Conus	adversarius	Conidae	extinct	41.036	87.395	87.395	0.34715	27.3612	-82.4347	27.4453	-82.1151	mPWP	72343000	294.79	296.364	305.185	0.000254357	0.000291374	0.000607925	3.51808e-12	3.26984e+07
gastropod	Conus	anabathrum	Conidae	extant	17.143	31.727	31.727	0.0503741	30.388	-84.6462	30.4785	-84.317	mPWP	72343000	289.525	293.397	304.471	3.75714e-05	5.29838e-05	0.00013493	5.1966e-13	7.69062e+06
gastropod	Conus	anabathrum	Conidae	extant	15.882	33.218	33.218	0.0549796	25.726	-80.4281	25.8041	-80.1131	mPWP	72343000	290.918	296.981	306.277	4.54453e-05	7.71447e-05	0.000166718	6.28566e-13	8.21127e+06
gastropod	Conus	bassi	Conidae	extinct	15.753	33.014	33.014	0.0543381	27.3666	-82.451	27.4507	-82.1314	mPWP	72343000	294.79	296.364	305.185	6.32639e-05	7.24707e-05	0.000151204	8.75019e-13	8.13276e+06
gastropod	Conus	delessertii	Conidae	extant	17	35.467	35.467	0.0622874	26.2806	-83.3969	NA	NA	PI	72343000	286.82	292.523	303.008	3.44532e-05	5.75206e-05	0.000140357	4.76532e-13	9.0158e+06
gastropod	Conus	delessertii	Conidae	extant	30.959	64.937	64.937	0.197144	27.3041	-81.025	27.384	-80.7045	mPWP	72343000	293.689	296.119	304.281	0.000151188	0.000186643	0.000369533	2.09113e-12	2.13907e+07
gastropod	Conus	evergladesensis	Conidae	extinct	14.182	28.091	28.091	0.0399489	26.4724	-80.6089	NA	NA	LIG	72343000	289.903	292.696	303.231	3.26237e-05	4.18133e-05	0.000102338	4.51227e-13	6.45458e+06
gastropod	Conus	haytensis	Conidae	extinct	72.774	127.826	127.826	0.716299	26.7248	-81.2356	26.8053	-80.9174	mPWP	72343000	293.689	296.119	304.281	0.000397881	0.000491185	0.000972495	5.50319e-12	5.62936e+07
gastropod	Conus	haytensis	Conidae	extinct	101.993	165.498	165.498	1.17162	27.3666	-82.451	27.4507	-82.1314	mPWP	72343000	294.79	296.364	305.185	0.000633351	0.000725524	0.00151374	8.76005e-12	8.14192e+07
gastropod	Conus	jaspideus	Conidae	extant	9.65	20.028	20.028	0.0209703	26.7135	-80.3686	NA	NA	LGM	72343000	288.035	293.204	300.477	1.703e-05	2.70177e-05	5.03477e-05	2.35546e-13	3.98844e+06
gastropod	Conus	jaspideus	Conidae	extant	10.333	21.8	21.8	0.0246459	25.8211	-80.4366	NA	NA	LIG	72343000	286.859	293.322	304.638	1.72244e-05	3.07366e-05	7.98687e-05	2.38235e-13	4.49096e+06
gastropod	Conus	marylandicus	Conidae	extinct	14.55	33.433	33.433	0.0556594	34.4428	-78.9567	34.5165	-78.6056	mPWP	72343000	290.936	293.863	304.524	4.59518e-05	5.94845e-05	0.000146067	6.35571e-13	8.28953e+06
gastropod	Conus	miamiensis	Conidae	extinct	18.742	33.145	33.145	0.0547496	27.3666	-82.451	27.4507	-82.1314	mPWP	72343000	294.79	296.364	305.185	6.36131e-05	7.28708e-05	0.000152038	8.79849e-13	8.17766e+06
gastropod	Conus	oniscus	Conidae	extinct	15.492	34.059	34.059	0.0576616	27.0776	-81.1187	27.1578	-80.7992	mPWP	72343000	293.689	296.119	304.281	6.01608e-05	7.42688e-05	0.000147044	8.321e-13	8.51178e+06
gastropod	Conus	paranobilis	Conidae	extinct	24.461	51.299	51.299	0.125818	27.3666	-82.451	27.4507	-82.1314	mPWP	72343000	294.79	296.364	305.185	0.000118813	0.000136104	0.000283968	1.64333e-12	1.52737e+07
gastropod	Conus	spurius	Conidae	extant	24.583	41.723	41.723	0.084879	26.9142	-82.3194	NA	NA	LGM	72343000	289.403	293.421	300.888	5.49518e-05	7.85117e-05	0.000148557	7.60052e-13	1.13715e+07
gastropod	Conus	spurius	Conidae	extant	40	67.042	67.042	0.209496	26.7654	-81.4106	NA	NA	LGM	72343000	289.022	293.919	300.325	0.000104532	0.000161451	0.000279055	1.44581e-12	2.23882e+07
gastropod	Conus	yaquensis	Conidae	extinct	22.682	40.264	40.264	0.0793143	27.3666	-82.451	27.4507	-82.1314	mPWP	72343000	294.79	296.364	305.185	8.40448e-05	9.62759e-05	0.000200871	1.16245e-12	1.08042e+07
gastropod	Conus	yaquensis	Conidae	extinct	35.244	59.878	59.878	0.168919	27.3666	-82.451	27.4507	-82.1314	mPWP	72343000	294.79	296.364	305.185	0.000148189	0.000169755	0.000354178	2.04964e-12	1.90501e+07
gastropod	Crepidula	fornicata	Calyptraeidae	extant	6.621	9.221	9.221	0.00478506	29.8759	-81.3509	NA	NA	LGM	67388000	282.912	290.284	300.827	3.2617e-06	6.41785e-06	1.59503e-05	4.83932e-14	1.22719e+06
gastropod	Crepidula	fornicata	Calyptraeidae	extant	10.056	11.927	11.927	0.00781226	41.2421	-72.7602	NA	NA	PI	67388000	282.129	283.436	297.044	4.37066e-06	4.94407e-06	1.67255e-05	6.48466e-14	1.77071e+06
gastropod	Crepidula	fornicata	Calyptraeidae	extant	14.575	18.518	18.518	0.0180614	41.2421	-72.7602	NA	NA	PI	67388000	282.129	283.436	297.044	8.20953e-06	9.28657e-06	3.14159e-05	1.21803e-13	3.32597e+06
gastropod	Crepidula	fornicata	Calyptraeidae	extant	31.869	50.673	50.673	0.122909	29.6873	-81.5215	29.7687	-81.1923	mPWP	67388000	290.502	295.908	304.622	7.46099e-05	0.000119886	0.000248497	1.10697e-12	1.3991e+07
gastropod	Crepidula	plana	Calyptraeidae	extant	12.539	20.096	20.096	0.0211061	29.8759	-81.3509	NA	NA	LGM	67388000	282.912	290.284	300.827	9.91756e-06	1.95142e-05	4.84985e-05	1.47145e-13	3.7314e+06
gastropod	Crepidula	plana	Calyptraeidae	extant	32.283	42.717	42.717	0.0887727	27.3666	-82.451	27.4507	-82.1314	mPWP	67388000	294.79	296.364	305.185	8.52879e-05	9.76999e-05	0.000203842	1.2654e-12	1.0964e+07
gastropod	Cyclostremiscus	bartschi	Liotiidae	extinct	1.017	0.586	1.017	7.17681e-05	30.3876	-84.6454	30.478	-84.3162	mPWP	60451000	289.525	293.397	304.471	2.30539e-07	3.2511e-07	8.27934e-07	3.81057e-15	47189.9
gastropod	Cymatophos	lindae	Buccinidae	extinct	27.872	68.404	68.404	0.217678	27.3666	-82.451	27.4507	-82.1314	mPWP	72343000	294.79	296.364	305.185	0.000179233	0.000205317	0.000428375	2.47901e-12	2.30409e+07
gastropod	Dallitesta	coensis	Naticidae	extinct	23.413	33.651	33.651	0.0563529	30.388	-84.6462	30.4785	-84.317	mPWP	47568000	289.525	293.397	304.471	2.6913e-05	3.79532e-05	9.66525e-05	5.65399e-13	5.50892e+06
gastropod	Dallitesta	coensis	Naticidae	extinct	29.709	34.272	34.272	0.0583505	30.388	-84.6462	30.4785	-84.317	mPWP	47568000	289.525	293.397	304.471	2.76257e-05	3.89582e-05	9.92118e-05	5.80371e-13	5.65479e+06
gastropod	Dallitesta	coensis	Naticidae	extinct	38.798	49.727	49.727	0.118575	30.388	-84.6462	30.4785	-84.317	mPWP	47568000	289.525	293.397	304.471	4.69892e-05	6.6265e-05	0.000168752	9.87168e-13	9.61838e+06
gastropod	Distorsio	clathrata	Personidae	extant	23.514	41.649	41.649	0.0845924	25.8211	-80.4366	NA	NA	LIG	63424000	286.859	293.322	304.638	3.81436e-05	6.80665e-05	0.00017687	6.01635e-13	9.94528e+06
gastropod	Ecphora	bradleyae	Muricidae	extinct	59.764	57.525	59.764	0.168307	27.368	-82.4364	27.4521	-82.1167	mPWP	55496000	294.79	296.364	305.185	0.000113446	0.000129955	0.00027114	2.04406e-12	1.45838e+07
gastropod	Ecphora	quadricostata	Muricidae	extinct	48.55	53.417	53.417	0.135898	27.3666	-82.451	27.4507	-82.1314	mPWP	55496000	294.79	296.364	305.185	9.66321e-05	0.000110695	0.000230955	1.74112e-12	1.24223e+07
gastropod	Ecphora	quadricostata	Muricidae	extinct	54.122	56.229	56.229	0.149851	27.3666	-82.451	27.4507	-82.1314	mPWP	55496000	294.79	296.364	305.185	0.000103981	0.000119114	0.00024852	1.87354e-12	1.33671e+07
gastropod	Eupleura	caudata	Muricidae	extant	7.764	14.051	14.051	0.010675	41.4639	-70.8201	NA	NA	PI	55496000	283.274	284.601	297.585	5.07745e-06	5.74863e-06	1.82636e-05	9.14855e-14	1.84642e+06
gastropod	Eupleura	caudata	Muricidae	extant	9.227	17.191	17.191	0.0156759	41.4211	-70.4694	NA	NA	PI	55496000	282.983	283.695	296.467	6.58604e-06	7.0419e-06	2.21303e-05	1.18667e-13	2.4616e+06
gastropod	Eupleura	leonensis	Muricidae	extinct	22.374	28.974	28.974	0.0423751	27.3982	-82.388	27.4821	-82.0682	mPWP	55496000	294.79	296.364	305.185	4.03399e-05	4.62106e-05	9.64143e-05	7.26845e-13	5.18582e+06
gastropod	Eupleura	metae	Muricidae	extinct	18.023	21.682	21.682	0.0243924	27.3666	-82.451	27.4507	-82.1314	mPWP	55496000	294.79	296.364	305.185	2.66534e-05	3.05323e-05	6.37029e-05	4.80242e-13	3.42638e+06
gastropod	Eupleura	metae	Muricidae	extinct	18.812	27.837	27.837	0.0392636	27.3666	-82.451	27.4507	-82.1314	mPWP	55496000	294.79	296.364	305.185	3.8107e-05	4.36528e-05	9.10776e-05	6.86613e-13	4.89877e+06
gastropod	Eupleura	miocenica	Muricidae	extinct	15.701	28.542	28.542	0.0411796	27.3612	-82.4347	27.4453	-82.1151	mPWP	55496000	294.79	296.364	305.185	3.94806e-05	4.52262e-05	9.43605e-05	7.11362e-13	5.07535e+06
gastropod	Eupleura	miocenica	Muricidae	extinct	17.094	28.627	28.627	0.0414136	30.388	-84.6462	30.4785	-84.317	mPWP	55496000	289.525	293.397	304.471	2.48851e-05	3.50934e-05	8.93696e-05	4.4838e-13	5.09382e+06
gastropod	Euspira	sayana	Naticidae	extinct	33.86	38.382	38.382	0.0724016	34.2385	-79.8424	34.3148	-79.493	mPWP	47568000	293.133	292.332	303.809	4.47262e-05	4.1682e-05	0.000110443	9.39626e-13	6.64371e+06
gastropod	Fasciolaria	okeechobensis	Fasciolariidae	extinct	77.388	134.857	134.857	0.79322	26.7935	-81.3363	NA	NA	LIG	72343000	289.903	292.696	303.231	0.000307149	0.000393668	0.000963505	4.24826e-12	6.07692e+07
gastropod	Favartia	cellulosa	Muricidae	extant	9.482	15.622	15.622	0.0130633	27.368	-82.4364	27.4521	-82.1167	mPWP	55496000	294.79	296.364	305.185	1.67172e-05	1.91501e-05	3.99549e-05	3.01211e-13	2.14905e+06
gastropod	Favartia	cellulosa	Muricidae	extant	11.809	23.141	23.141	0.0276142	26.6595	-80.6765	NA	NA	LIG	55496000	289.903	292.696	303.231	1.8995e-05	2.43457e-05	5.95861e-05	3.42253e-13	3.75816e+06
gastropod	Fusinus	watermani	Fasciolariidae	extinct	22.439	96.675	96.675	0.420735	26.6595	-80.6765	NA	NA	LIG	72343000	289.903	292.696	303.231	0.000190902	0.000244676	0.000598846	2.64041e-12	3.77698e+07
gastropod	Fusinus	watermani	Fasciolariidae	extinct	30.37	135.741	135.741	0.803155	26.6595	-80.6765	NA	NA	LIG	72343000	289.903	292.696	303.231	0.00031003	0.000397361	0.000972542	4.2881e-12	6.13392e+07
gastropod	Gelasinostoma	elegantula	Turbinidae	extinct	5.072	4.726	5.072	0.00153233	30.3876	-84.6454	NA	NA	LGM	60451000	281.648	288.489	298.412	1.10365e-06	2.08241e-06	4.96637e-06	1.82422e-14	468030
gastropod	Gemophos	auritulus	Buccinidae	extant	NA	26.6	26.6	0.0360068	26.7056	-80.0364	NA	NA	PI	72343000	284.69	293.398	301.743	1.8757e-05	4.11723e-05	8.38067e-05	2.59432e-13	5.97538e+06
gastropod	Gemophos	tinctus	Buccinidae	extant	13.393	23.205	23.205	0.0277599	27.7009	-82.4914	NA	NA	LGM	72343000	288.525	289.712	299.478	2.19733e-05	2.4455e-05	5.71478e-05	3.03918e-13	4.92234e+06
gastropod	Gemophos	tinctus	Buccinidae	extant	15.147	25.246	25.246	0.0325958	26.6595	-80.6765	NA	NA	LIG	72343000	289.903	292.696	303.231	2.80361e-05	3.59334e-05	8.79472e-05	3.87774e-13	5.54691e+06
gastropod	Heilprinia	carolinensis	Fasciolariidae	extinct	36.992	50.271	50.271	0.121058	27.3666	-82.451	27.4507	-82.1314	mPWP	72343000	294.79	296.364	305.185	0.000115426	0.000132224	0.000275873	1.59648e-12	1.48383e+07
gastropod	Heilprinia	equalis	Fasciolariidae	extinct	37.869	61.475	61.475	0.177605	34.8784	-78.075	34.9494	-77.7212	mPWP	72343000	283.894	295.488	304.638	5.76492e-05	0.000163459	0.000351786	7.97361e-13	1.97802e+07
gastropod	Heilprinia	florida	Fasciolariidae	extinct	21.3	44.406	44.406	0.0955787	27.368	-82.4364	27.4521	-82.1167	mPWP	72343000	294.79	296.364	305.185	9.6694e-05	0.000110766	0.000231103	1.3374e-12	1.24303e+07
gastropod	Hemipolygona	nosali	Fasciolariidae	extinct	22.262	43.327	43.327	0.0912032	27.3666	-82.451	27.4507	-82.1314	mPWP	72343000	294.79	296.364	305.185	9.33366e-05	0.00010692	0.000223079	1.29096e-12	1.19987e+07
gastropod	Hesperisternia	filicata	Buccinidae	extinct	19.601	34.959	34.959	0.0605989	27.3666	-82.451	27.4507	-82.1314	mPWP	72343000	294.79	296.364	305.185	6.86927e-05	7.86896e-05	0.000164179	9.50106e-13	8.83065e+06
gastropod	Hexaplex	fulvescens	Muricidae	extant	48.036	74.898	74.898	0.258732	27.693	-82.4952	NA	NA	LIG	55496000	289.405	291.798	304.039	9.73121e-05	0.00012049	0.000341045	1.75337e-12	2.0134e+07
gastropod	Hexaplex	fulvescens	Muricidae	extant	93.418	113.013	113.013	0.566493	28.048	-80.5475	NA	NA	LGM	55496000	280.562	289.884	301.145	7.70459e-05	0.000182859	0.000483684	1.38821e-12	3.62401e+07
gastropod	Hexaplex	hertweckorum	Muricidae	extinct	60.606	80.952	80.952	0.300026	27.3666	-82.451	27.4507	-82.1314	mPWP	55496000	294.79	296.364	305.185	0.000175017	0.000200487	0.000418298	3.15345e-12	2.24989e+07
gastropod	Hexaplex	jameshoubricki	Muricidae	extinct	49.025	76.695	76.695	0.270686	27.368	-82.4364	27.4521	-82.1167	mPWP	55496000	294.79	296.364	305.185	0.000162017	0.000185595	0.000387228	2.91922e-12	2.08278e+07
gastropod	Hexaplex	jameshoubricki	Muricidae	extinct	62.378	94.737	94.737	0.404813	27.368	-82.4364	27.4521	-82.1167	mPWP	55496000	294.79	296.364	305.185	0.000219105	0.000250991	0.000523671	3.94783e-12	2.81666e+07
gastropod	Hipponix	floridanus	Hipponicidae	extant	12.83	17.585	17.585	0.0163675	27.3666	-82.451	27.4507	-82.1314	mPWP	63424000	294.79	296.364	305.185	2.26016e-05	2.58909e-05	5.4019e-05	3.56493e-13	2.90551e+06
gastropod	Hystrivasum	locklini	Turbinellidae	extinct	61.197	95.946	95.946	0.414711	27.3666	-82.451	27.4507	-82.1314	mPWP	72343000	294.79	296.364	305.185	0.000290647	0.000332945	0.000694659	4.02001e-12	3.73635e+07
gastropod	Hystrivasum	olssoni	Turbinellidae	extinct	51.558	91.169	91.169	0.376265	27.34	-81.34	27.4208	-81.0196	mPWP	72343000	293.689	296.119	304.281	0.0002455	0.000303071	0.000600049	3.39558e-12	3.47343e+07
gastropod	Hystrivasum	schrinerae	Turbinellidae	extinct	79.675	121.169	121.169	0.646913	27.3069	-81.0192	27.3868	-80.6988	mPWP	72343000	293.689	296.119	304.281	0.000368609	0.00045505	0.000900951	5.09833e-12	5.21522e+07
gastropod	Hystrivasum	squamosum	Turbinellidae	extinct	62.609	105.942	105.942	0.500887	27.34	-81.34	27.4208	-81.0196	mPWP	72343000	293.689	296.119	304.281	0.000304254	0.000375603	0.000743655	4.20822e-12	4.3047e+07
gastropod	Linatella	caudata	Ranellidae	extinct	57.246	92.656	92.656	0.388042	27.3666	-82.451	27.4507	-82.1314	mPWP	63424000	294.79	296.364	305.185	0.000242475	0.000277762	0.000579526	3.82452e-12	3.11708e+07
gastropod	Lindoliva	diegelae	Olividae	extinct	43.946	118.565	118.565	0.620686	25.7926	-80.4372	NA	NA	LIG	72343000	286.859	293.322	304.638	0.000193909	0.000346026	0.000899144	2.682e-12	5.05583e+07
gastropod	Lithopoma	tectariaeformis	Turbinidae	extinct	28.974	34.786	34.786	0.0600289	26.2759	-81.6653	26.3577	-81.3491	mPWP	60451000	293.689	296.119	304.281	5.18397e-05	6.39964e-05	0.000126706	8.56854e-13	7.33447e+06
gastropod	Lobatus	diegelae	Strombidae	extinct	56.851	91.96	91.96	0.382508	25.8211	-80.4366	NA	NA	LIG	63424000	286.859	293.322	304.638	0.00011827	0.000211051	0.000548412	1.86546e-12	3.08368e+07
gastropod	Lobatus	hertweckorum	Strombidae	extinct	115.122	171.707	171.707	1.25677	27.3612	-82.4347	27.4453	-82.1151	mPWP	63424000	294.79	296.364	305.185	0.000585395	0.000670588	0.00139912	9.23336e-12	7.52543e+07
gastropod	Lobatus	hertweckorum	Strombidae	extinct	114.706	183.824	183.824	1.4311	27.3666	-82.451	27.4507	-82.1314	mPWP	63424000	294.79	296.364	305.185	0.000645298	0.000739209	0.00154229	1.01782e-11	8.2955e+07
gastropod	Lobatus	mayacensis	Strombidae	extinct	74.019	115.844	115.844	0.593832	26.6595	-80.6765	NA	NA	LIG	63424000	289.903	292.696	303.231	0.000216772	0.000277833	0.000679998	3.41911e-12	4.28881e+07
gastropod	Lobatus	mayacensis	Strombidae	extinct	109.697	155.758	155.758	1.04377	26.6595	-80.6765	NA	NA	LIG	63424000	289.903	292.696	303.231	0.000330908	0.000424119	0.00103803	5.21936e-12	6.54698e+07
gastropod	Mangelia	gardnerae	Mangeliidae	extinct	2.619	5.93	5.93	0.00206374	30.3876	-84.6454	30.478	-84.3162	mPWP	72343000	289.525	293.397	304.471	3.41535e-06	4.81638e-06	1.22655e-05	4.72385e-14	699099
gastropod	Massyla	propevenusta	Cancellariidae	extinct	22.491	39.341	39.341	0.0758866	27.3666	-82.451	27.4507	-82.1314	mPWP	72343000	294.79	296.364	305.185	8.13275e-05	9.31631e-05	0.000194376	1.12486e-12	1.04549e+07
gastropod	Monoplex	krebsii	Ranellidae	extant	22.004	43.568	43.568	0.092172	26.7156	-80.6957	NA	NA	LIG	63424000	289.903	292.696	303.231	5.36171e-05	6.87202e-05	0.000168193	8.45695e-13	1.06081e+07
gastropod	Monoplex	krebsii	Ranellidae	extant	25.813	48.069	48.069	0.111157	25.8211	-80.4366	NA	NA	LIG	63424000	286.859	293.322	304.638	4.6811e-05	8.35332e-05	0.00021706	7.38343e-13	1.22051e+07
gastropod	Murexiella	faceta	Muricidae	extinct	17.964	26.972	26.972	0.0369721	27.3284	-81.0357	27.4083	-80.7151	mPWP	55496000	293.689	296.119	304.281	3.30931e-05	4.08536e-05	8.08859e-05	5.96273e-13	4.68214e+06
gastropod	Murexiella	faceta	Muricidae	extinct	16.667	27.381	27.381	0.0380475	27.3666	-82.451	27.4507	-82.1314	mPWP	55496000	294.79	296.364	305.185	3.71577e-05	4.25652e-05	8.88086e-05	6.69507e-13	4.77673e+06
gastropod	Murexiella	glypta	Muricidae	extant	9.692	17.003	17.003	0.015351	26.7498	-81.4772	NA	NA	LIG	55496000	289.903	292.696	303.231	1.22631e-05	1.57174e-05	3.84684e-05	2.20956e-13	2.42624e+06
gastropod	Murexiella	graceae	Muricidae	extinct	20.53	31.907	31.907	0.0509199	26.4724	-80.6089	NA	NA	LIG	55496000	289.903	292.696	303.231	3.00605e-05	3.85282e-05	9.42978e-05	5.41631e-13	5.94746e+06
gastropod	Murexiella	graceae	Muricidae	extinct	22.682	35.148	35.148	0.0612245	26.6595	-80.6765	NA	NA	LIG	55496000	289.903	292.696	303.231	3.45161e-05	4.42388e-05	0.000108275	6.21912e-13	6.82899e+06
gastropod	Murexiella	shilohensis	Muricidae	extinct	8.168	12.643	12.643	0.0087299	30.3866	-84.646	30.477	-84.3168	mPWP	55496000	289.525	293.397	304.471	7.74372e-06	1.09203e-05	2.781e-05	1.39527e-13	1.58509e+06
gastropod	Murexiella	shilohensis	Muricidae	extinct	9.091	15.833	15.833	0.0134015	27.2339	-80.9772	27.3137	-80.657	mPWP	55496000	293.689	296.119	304.281	1.54495e-05	1.90725e-05	3.77616e-05	2.7837e-13	2.18586e+06
gastropod	Murexsul	oxytatus	Muricidae	extinct	15.128	30.667	30.667	0.0472165	27.3583	-82.4615	27.4424	-82.1419	mPWP	55496000	294.79	296.364	305.185	4.37187e-05	5.00811e-05	0.00010449	7.87724e-13	5.62017e+06
gastropod	Nassarius	cornellianus	Nassariidae	extinct	2.142	3.835	3.835	0.000899617	30.3876	-84.6454	30.478	-84.3162	mPWP	117929000	289.525	293.397	304.471	2.99544e-06	4.22422e-06	1.07575e-05	2.5385e-14	613146
gastropod	Nassarius	quadridentatus	Nassariidae	extinct	3.705	6.202	6.202	0.0022478	30.3866	-84.646	30.477	-84.3168	mPWP	117929000	289.525	293.397	304.471	5.95546e-06	8.39849e-06	2.13878e-05	5.047e-14	1.21904e+06
gastropod	Nassarius	quadridentatus	Nassariidae	extinct	3.961	6.795	6.795	0.00267489	30.3914	-84.6421	30.4818	-84.3129	mPWP	117929000	289.525	293.397	304.471	6.77114e-06	9.54878e-06	2.43171e-05	5.73825e-14	1.38601e+06
gastropod	Nassarius	vibex	Nassariidae	extant	9.543	14.135	14.135	0.0107969	29.8759	-81.3509	NA	NA	LGM	117929000	282.912	290.284	300.827	1.05071e-05	2.06742e-05	5.13815e-05	8.90432e-14	3.95321e+06
gastropod	Nassarius	vibex	Nassariidae	extant	10.93	17.171	17.171	0.0156412	26.3586	-81.5658	NA	NA	LIG	117929000	289.903	292.696	303.231	2.63264e-05	3.37421e-05	8.2584e-05	2.23105e-13	5.20865e+06
gastropod	Naticarius	plicatella	Naticidae	extinct	42.987	45.195	45.195	0.0988398	27.3803	-82.3779	27.4642	-82.0581	mPWP	47568000	294.79	296.364	305.185	6.52518e-05	7.47479e-05	0.000155955	1.37084e-12	8.38831e+06
gastropod	Neverita	duplicata	Naticidae	extant	28.76	33.841	33.841	0.0569605	41.2403	-72.9706	NA	NA	PI	47568000	281.286	284.408	295.906	1.26506e-05	1.69789e-05	4.7573e-05	2.65769e-13	5.55281e+06
gastropod	Neverita	duplicata	Naticidae	extant	68.571	64.107	68.571	0.218692	27.3666	-82.451	27.4507	-82.1314	mPWP	47568000	294.79	296.364	305.185	0.000118413	0.000135646	0.000283012	2.48767e-12	1.52223e+07
gastropod	Neverita	duplicata	Naticidae	extant	69.599	61.777	69.599	0.22498	29.6972	-81.5347	29.7787	-81.2054	mPWP	47568000	290.502	295.908	304.622	8.29207e-05	0.00013324	0.000276178	1.74203e-12	1.55494e+07
gastropod	Oliva	sayana	Olividae	extant	16.325	36.945	36.945	0.0673253	25.2967	-81.6633	NA	NA	PI	72343000	288.435	294.332	302.869	4.22961e-05	7.14161e-05	0.000147027	5.85008e-13	9.55322e+06
gastropod	Oliva	sayana	Olividae	extant	17.018	40.29	40.29	0.0794119	25.7656	-82.1558	NA	NA	PI	72343000	289.555	291.924	302.996	5.29761e-05	6.54416e-05	0.000168184	7.32727e-13	1.08144e+07
gastropod	Oliva	sayana	Olividae	extant	17.955	40.379	40.379	0.0797464	25.7647	-82.5269	NA	NA	PI	72343000	289.555	291.924	302.996	5.31262e-05	6.5627e-05	0.000168661	7.34802e-13	1.08451e+07
gastropod	Oliva	sayana	Olividae	extant	20.584	49.258	49.258	0.116454	29.52	-80.67	NA	NA	PI	72343000	287.711	293.328	302.852	5.97505e-05	9.86991e-05	0.000221526	8.26424e-13	1.4413e+07
gastropod	Oliva	sayana	Olividae	extant	24.1	56.233	56.233	0.149871	28.0406	-82.6761	NA	NA	LGM	72343000	288.525	289.712	299.478	7.77409e-05	8.65211e-05	0.000202188	1.07525e-12	1.74151e+07
gastropod	Panamurex	clarksvillensis	Muricidae	extinct	12.947	21.526	21.526	0.0240591	30.3866	-84.646	30.477	-84.3168	mPWP	55496000	289.525	293.397	304.471	1.65845e-05	2.33877e-05	5.95597e-05	2.98819e-13	3.39473e+06
gastropod	Panamurex	clarksvillensis	Muricidae	extinct	16.333	28.166	28.166	0.0401524	30.4642	-84.9871	30.5556	-84.6579	mPWP	55496000	289.525	293.397	304.471	2.43421e-05	3.43277e-05	8.74197e-05	4.38597e-13	4.98267e+06
gastropod	Perplicaria	perplexa	Cancellariidae	extinct	6.705	19.619	19.619	0.020162	27.3666	-82.451	27.4507	-82.1314	mPWP	72343000	294.79	296.364	305.185	3.01349e-05	3.45204e-05	7.20238e-05	4.16803e-13	3.87393e+06
gastropod	Phos	sloani	Buccinidae	extinct	6.71	16.258	16.258	0.0140951	30.3876	-84.6454	30.478	-84.3162	mPWP	72343000	289.525	293.397	304.471	1.44527e-05	2.03814e-05	5.19038e-05	1.99899e-13	2.95837e+06
gastropod	Phos	sloani	Buccinidae	extinct	8.679	24.758	24.758	0.031406	27.3284	-81.0357	27.4083	-80.7151	mPWP	72343000	293.689	296.119	304.281	3.81179e-05	4.70568e-05	9.31674e-05	5.27219e-13	5.39306e+06
gastropod	Phos	vaughani	Buccinidae	extinct	6.067	15.123	15.123	0.0122799	30.3876	-84.6454	30.478	-84.3162	mPWP	72343000	289.525	293.397	304.471	1.30456e-05	1.83971e-05	4.68505e-05	1.80437e-13	2.67034e+06
gastropod	Phyllonotus	globosus	Muricidae	extant	66.596	102.34	102.34	0.468944	27.3666	-82.451	27.4507	-82.1314	mPWP	55496000	294.79	296.364	305.185	0.000244654	0.000280258	0.000584734	4.40817e-12	3.1451e+07
gastropod	Phyllonotus	globosus	Muricidae	extant	71.979	116.996	116.996	0.605133	27.0703	-81.8586	27.1527	-81.5396	mPWP	55496000	293.689	296.119	304.281	0.000269138	0.000332252	0.000657823	4.84933e-12	3.80786e+07
gastropod	Phyllonotus	leonensis	Muricidae	extinct	43.23	67.578	67.578	0.212698	27.3666	-82.451	27.4507	-82.1314	mPWP	55496000	294.79	296.364	305.185	0.000135218	0.000154896	0.000323177	2.43636e-12	1.73826e+07
gastropod	Phyllonotus	pomum	Muricidae	extant	28.519	45.37	45.37	0.0995702	26.6795	-80.7131	NA	NA	LIG	55496000	289.903	292.696	303.231	4.9734e-05	6.37433e-05	0.000156012	8.96107e-13	9.83983e+06
gastropod	Phyllonotus	pomum	Muricidae	extant	28.654	46.949	46.949	0.106275	26.6595	-80.6765	NA	NA	LIG	55496000	289.903	292.696	303.231	5.22136e-05	6.69213e-05	0.00016379	9.40785e-13	1.03304e+07
gastropod	Phyllonotus	pomum	Muricidae	extant	35.136	54.926	54.926	0.143305	19.9193	-75.1388	NA	NA	LGM	55496000	275.618	298.568	301.344	1.697e-05	0.000138997	0.000175408	3.05765e-13	1.29268e+07
gastropod	Phyllonotus	riparius	Muricidae	extinct	23.355	39.013	39.013	0.0746859	27.368	-82.4364	27.4521	-82.1167	mPWP	55496000	294.79	296.364	305.185	6.16881e-05	7.06656e-05	0.000147437	1.1115e-12	7.93019e+06
gastropod	Phyllonotus	riparius	Muricidae	extinct	19.055	39.836	39.836	0.0777159	30.3866	-84.646	30.477	-84.3168	mPWP	55496000	289.525	293.397	304.471	3.99029e-05	5.62718e-05	0.000143303	7.18972e-13	8.16787e+06
gastropod	Polinices	carolinianus	Naticidae	extinct	19.436	21.881	21.881	0.0248206	26.1681	-81.1396	26.2484	-80.8234	mPWP	47568000	291.56	296.269	304.681	1.74309e-05	2.6292e-05	5.30919e-05	3.66196e-13	2.97472e+06
gastropod	Polinices	carolinianus	Naticidae	extinct	26.447	29.921	29.921	0.0450525	30.4108	-84.5416	30.501	-84.2122	mPWP	47568000	292.238	294.275	304	2.89829e-05	3.46528e-05	7.86579e-05	6.08885e-13	4.65843e+06
gastropod	Polinices	lacteus	Naticidae	extant	18.584	19.41	19.41	0.0197548	25.8178	-80.4209	NA	NA	LIG	47568000	286.859	293.322	304.638	9.63631e-06	1.71958e-05	4.46831e-05	2.02444e-13	2.5125e+06
gastropod	Polinices	lacteus	Naticidae	extant	19.818	21.318	21.318	0.0236182	19.972	-75.1395	NA	NA	LGM	47568000	275.618	298.568	301.344	3.76255e-06	3.08183e-05	3.88912e-05	7.90453e-14	2.8661e+06
gastropod	Polygona	angulata	Fasciolariidae	extant	21.746	53.73	53.73	0.137419	26.5005	-80.6803	NA	NA	LIG	72343000	289.903	292.696	303.231	8.24783e-05	0.000105711	0.000258729	1.14078e-12	1.63183e+07
gastropod	Polygona	jucunda	Fasciolariidae	extant	12.924	30.563	30.563	0.0469119	26.6595	-80.6765	NA	NA	LIG	72343000	289.903	292.696	303.231	3.68284e-05	4.72025e-05	0.000115528	5.09384e-13	7.28648e+06
gastropod	Pterorytis	fluviana	Muricidae	extinct	33.82	54.045	54.045	0.138958	27.3307	-81.0348	27.4106	-80.7143	mPWP	55496000	293.689	296.119	304.281	8.92791e-05	0.000110215	0.000218215	1.60863e-12	1.26315e+07
gastropod	Pterorytis	roxaneae	Muricidae	extinct	22.747	31.978	31.978	0.051136	27.368	-82.4364	27.4521	-82.1167	mPWP	55496000	294.79	296.364	305.185	4.64009e-05	5.31537e-05	0.0001109	8.36052e-13	5.96498e+06
gastropod	Pterorytis	roxaneae	Muricidae	extinct	20.58	32.762	32.762	0.0535507	27.3612	-82.4347	27.4453	-82.1151	mPWP	55496000	294.79	296.364	305.185	4.80933e-05	5.50923e-05	0.000114945	8.66545e-13	6.18253e+06
gastropod	Ptychosalpinx	laqueata	Buccinidae	extinct	20.516	33.677	33.677	0.0564358	30.3866	-84.646	30.477	-84.3168	mPWP	72343000	289.525	293.397	304.471	4.08784e-05	5.76474e-05	0.000146806	5.65399e-13	8.36754e+06
gastropod	Ptychosalpinx	laqueata	Buccinidae	extinct	23.083	37.296	37.296	0.068549	27.293	-81.0072	27.3728	-80.6867	mPWP	72343000	293.689	296.119	304.281	6.84226e-05	8.44681e-05	0.000167238	9.46371e-13	9.68069e+06
gastropod	Ptychosalpinx	laqueata	Buccinidae	extinct	27.693	51.565	51.565	0.127064	30.3866	-84.646	30.477	-84.3168	mPWP	72343000	289.525	293.397	304.471	7.5171e-05	0.000106007	0.000269961	1.03971e-12	1.5387e+07
gastropod	Sconsia	hodgii	Cassidae	extinct	25.096	48.946	48.946	0.115053	30.3914	-84.6421	30.4818	-84.3129	mPWP	63424000	289.525	293.397	304.471	6.11868e-05	8.62866e-05	0.000219739	9.65091e-13	1.25245e+07
gastropod	Sconsia	hodgii	Cassidae	extinct	42.085	69.446	69.446	0.224039	27.368	-82.4364	27.4521	-82.1167	mPWP	63424000	294.79	296.364	305.185	0.000160601	0.000183974	0.000383845	2.53314e-12	2.06458e+07
gastropod	Semicassis	granulata	Cassidae	extant	32.253	49.659	49.659	0.118266	25.8178	-80.4209	NA	NA	LIG	63424000	286.859	293.322	304.638	4.90388e-05	8.75087e-05	0.00022739	7.73483e-13	1.2786e+07
gastropod	Semicassis	granulata	Cassidae	extant	37.764	58.567	58.567	0.161944	26.6595	-80.6765	NA	NA	LIG	63424000	289.903	292.696	303.231	8.18046e-05	0.000104848	0.000256615	1.29029e-12	1.6185e+07
gastropod	Sigatica	bathyora	Naticidae	extinct	6.319	6.14	6.319	0.00232927	30.3876	-84.6454	30.478	-84.3162	mPWP	47568000	289.525	293.397	304.471	2.46615e-06	3.47781e-06	8.85667e-06	5.18099e-14	504805
gastropod	Sigatica	bathyora	Naticidae	extinct	8.829	8.428	8.829	0.004405	26.1681	-81.1396	26.2484	-80.8234	mPWP	47568000	291.56	296.269	304.681	4.77322e-06	7.19969e-06	1.45385e-05	1.00278e-13	814584
gastropod	Sigatica	semisulcata	Naticidae	extant	5.439	5.38	5.439	0.00175045	26.6595	-80.6765	NA	NA	LIG	47568000	289.903	292.696	303.231	2.0585e-06	2.63835e-06	6.45737e-06	4.32458e-14	407273
gastropod	Sinistrofulgur	contrarium	Buccinidae	extinct	71.484	135.3	135.3	0.798192	26.7946	-81.3359	NA	NA	LIG	72343000	289.903	292.696	303.231	0.000308592	0.000395517	0.00096803	4.26821e-12	6.10546e+07
gastropod	Sinistrofulgur	contrarium	Buccinidae	extinct	97.068	172.313	172.313	1.26523	26.6595	-80.6765	NA	NA	LIG	72343000	289.903	292.696	303.231	0.000435945	0.000558744	0.00136753	6.02967e-12	8.62514e+07
gastropod	Sinum	perspectivum	Naticidae	extant	27.339	11.182	27.339	0.0379364	26.6595	-80.6765	NA	NA	LIG	47568000	289.903	292.696	303.231	2.06658e-05	2.6487e-05	6.48271e-05	4.34155e-13	4.08871e+06
gastropod	Sinum	perspectivum	Naticidae	extant	29.708	10.973	29.708	0.0444435	32.8226	-79.8287	NA	NA	LGM	47568000	283.501	290.751	301.385	1.29337e-05	2.51042e-05	6.26834e-05	2.71716e-13	4.60409e+06
gastropod	Sinum	polandi	Naticidae	extinct	30.634	17.583	30.634	0.0471197	26.6595	-80.6765	NA	NA	LIG	47568000	289.903	292.696	303.231	2.43242e-05	3.11759e-05	7.63032e-05	5.11012e-13	4.81252e+06
gastropod	Siphocypraea	carolinensis	Conidae	extinct	24.078	35.728	35.728	0.0631635	30.3914	-84.6421	30.4818	-84.3129	mPWP	72343000	289.525	293.397	304.471	4.45217e-05	6.27853e-05	0.000159891	6.15792e-13	9.11331e+06
gastropod	Strombus	floridanus	Strombidae	extinct	35.551	62.37	62.37	0.182563	27.368	-82.4364	27.4521	-82.1167	mPWP	63424000	294.79	296.364	305.185	0.000137742	0.000157788	0.00032921	2.17259e-12	1.77072e+07
gastropod	Strombus	floridanus	Strombidae	extinct	38.919	62.823	62.823	0.185098	30.3866	-84.646	30.477	-84.3168	mPWP	63424000	289.525	293.397	304.471	8.74049e-05	0.00012326	0.000313897	1.37863e-12	1.78912e+07
gastropod	Strombus	pugilis	Strombidae	extant	41.857	68.857	68.857	0.220433	19.9618	-75.1269	NA	NA	LGM	63424000	275.618	298.568	301.344	2.67755e-05	0.000219312	0.000276762	4.22327e-13	2.03961e+07
gastropod	Strombus	pugilis	Strombidae	extant	50.672	83.991	83.991	0.321846	25.7926	-80.4372	NA	NA	LIG	63424000	286.859	293.322	304.638	0.000103904	0.000185414	0.000481795	1.63886e-12	2.7091e+07
gastropod	Terebra	dislocata	Terebridae	extant	7.19	27.98	27.98	0.0396488	28.0406	-82.6761	NA	NA	LGM	72343000	288.525	289.712	299.478	2.86505e-05	3.18864e-05	7.45139e-05	3.96273e-13	6.41815e+06
gastropod	Terebra	dislocata	Terebridae	extant	NA	40.2	40.2	0.0790743	25.899	-81.7151	NA	NA	PI	72343000	288.435	294.332	302.869	4.77443e-05	8.06152e-05	0.000165966	6.60364e-13	1.07838e+07
gastropod	Terebraspira	elegans	Fasciolariidae	extinct	29.868	76.343	76.343	0.268324	34.7071	-78.7416	34.7802	-78.3892	mPWP	72343000	290.936	293.863	304.524	0.000149419	0.000193423	0.00047496	2.06665e-12	2.69546e+07
gastropod	Tonna	galea	Tonnidae	extant	35.908	48.749	48.749	0.114172	26.6595	-80.6765	NA	NA	LIG	63424000	289.903	292.696	303.231	6.29397e-05	8.06688e-05	0.000197437	9.92739e-13	1.24526e+07
gastropod	Tonna	galea	Tonnidae	extant	52.572	69.453	69.453	0.224082	26.6595	-80.6765	NA	NA	LIG	63424000	289.903	292.696	303.231	0.000104366	0.000133764	0.000327389	1.64615e-12	2.06488e+07
gastropod	Toroliva	gladeensis	Olividae	extinct	10.827	25.863	25.863	0.0341301	27.3666	-82.451	27.4507	-82.1314	mPWP	72343000	294.79	296.364	305.185	4.46295e-05	5.11244e-05	0.000106667	6.17282e-13	5.73725e+06
gastropod	Trajana	pyta	Buccinidae	extinct	8	14.11	14.11	0.0107605	27.3666	-82.451	27.4507	-82.1314	mPWP	72343000	294.79	296.364	305.185	1.88419e-05	2.15839e-05	4.50329e-05	2.60607e-13	2.42218e+06
gastropod	Triplofusus	giganteus	Fasciolariidae	extant	65.408	112.358	112.358	0.560255	28.0406	-82.6761	NA	NA	LGM	72343000	288.525	289.712	299.478	0.000209002	0.000232607	0.00054357	2.89076e-12	4.68196e+07
gastropod	Triplofusus	giganteus	Fasciolariidae	extant	124.142	247.255	247.255	2.51725	27.3666	-82.451	27.4507	-82.1314	mPWP	72343000	294.79	296.364	305.185	0.00112396	0.00128753	0.00268632	1.55458e-11	1.44488e+08
gastropod	Triplofusus	giganteus	Fasciolariidae	extant	140.882	283.137	283.137	3.25865	27.3803	-82.3779	27.4642	-82.0581	mPWP	72343000	294.79	296.364	305.185	0.00136406	0.00156258	0.00326018	1.88667e-11	1.75355e+08
gastropod	Triplofusus	giganteus	Fasciolariidae	extant	139.063	329.933	329.933	4.361	26.7644	-83.3572	NA	NA	PI	72343000	287.115	293.342	303.623	0.000856612	0.00149594	0.00357217	1.1848e-11	2.18186e+08
gastropod	Trochita	floridana	Calyptraeidae	extinct	46.226	47.484	47.484	0.108594	27.3125	-81.025	27.3924	-80.7045	mPWP	67388000	293.689	296.119	304.281	9.01175e-05	0.00011125	0.000220264	1.33705e-12	1.27502e+07
gastropod	Turbinella	hoerlei	Turbinellidae	extinct	66.547	155.48	155.48	1.04022	26.6595	-80.6765	NA	NA	LIG	72343000	289.903	292.696	303.231	0.000376398	0.000482424	0.00118073	5.20606e-12	7.44701e+07
gastropod	Turbinella	regina	Turbinellidae	extinct	88.06	265.174	265.174	2.87615	27.3666	-82.451	27.4507	-82.1314	mPWP	72343000	294.79	296.364	305.185	0.00124212	0.00142289	0.00296873	1.71801e-11	1.59679e+08
gastropod	Turbo	castanea	Turbinidae	extant	22.907	26.436	26.436	0.0355851	19.972	-75.1395	NA	NA	LGM	60451000	275.618	298.568	301.344	6.50931e-06	5.33163e-05	6.72828e-05	1.07592e-13	4.95842e+06
gastropod	Turbo	castanea	Turbinidae	extant	21.868	26.798	26.798	0.0365191	26.6595	-80.6765	NA	NA	LIG	60451000	289.903	292.696	303.231	2.55353e-05	3.27282e-05	8.01024e-05	4.22071e-13	5.05214e+06
gastropod	Turritella	acropora	Turritellidae	extant	12.95	60.647	60.647	0.173076	26.1717	-80.9245	26.2514	-80.6081	mPWP	70361000	291.56	296.269	304.681	0.000110694	0.000166966	0.000337157	1.57236e-12	1.88908e+07
gastropod	Turritella	alumensis	Turritellidae	extinct	18.793	127.069	127.069	0.70824	30.3876	-84.6454	30.478	-84.3162	mPWP	70361000	289.525	293.397	304.471	0.000265524	0.000374447	0.000953575	3.77165e-12	5.4351e+07
gastropod	Turritella	apicalis	Turritellidae	extinct	10.397	40.819	40.819	0.08141	27.0034	-82.0904	27.0865	-81.7718	mPWP	70361000	294.79	296.364	305.185	8.34562e-05	9.56017e-05	0.000199464	1.18546e-12	1.07285e+07
gastropod	Turritella	cookei	Turritellidae	extinct	15.868	49.806	49.806	0.118934	30.3866	-84.646	30.477	-84.3168	mPWP	70361000	289.525	293.397	304.471	6.96544e-05	9.82279e-05	0.000250149	9.89409e-13	1.42578e+07
gastropod	Turritella	gladeensis	Turritellidae	extinct	12.94	45.369	45.369	0.099566	25.726	-80.4281	25.8041	-80.1131	mPWP	70361000	290.918	296.981	306.277	6.9079e-05	0.000117264	0.000253418	9.81235e-13	1.24815e+07
gastropod	Turritella	magnasulcus	Turritellidae	extinct	19.425	96.782	96.782	0.421622	27.368	-82.4364	27.4521	-82.1167	mPWP	70361000	294.79	296.364	305.185	0.000286539	0.000328239	0.00068484	4.07015e-12	3.68354e+07
gastropod	Turritella	mansfieldi	Turritellidae	extinct	20.056	72.284	72.284	0.241802	25.726	-80.4281	25.8041	-80.1131	mPWP	70361000	290.918	296.981	306.277	0.000134353	0.000228068	0.000492877	1.90842e-12	2.42755e+07
gastropod	Turritella	perattenuata	Turritellidae	extinct	11.149	63.447	63.447	0.188616	27.0776	-81.1187	27.1578	-80.7992	mPWP	70361000	293.689	296.119	304.281	0.000142413	0.00017581	0.000348084	2.02291e-12	2.01491e+07
gastropod	Turritella	pontoni	Turritellidae	extinct	34.022	117.631	117.631	0.611405	25.5516	-80.6327	25.6304	-80.3185	mPWP	70361000	290.918	296.981	306.277	0.0002694	0.000457315	0.000988304	3.82671e-12	4.86765e+07
gastropod	Turritella	subannulata	Turritellidae	extinct	2.339	7.194	7.194	0.00298204	27.693	-82.4952	NA	NA	LGM	70361000	288.525	289.712	299.478	4.00828e-06	4.46098e-06	1.04247e-05	5.69357e-14	897914
gastropod	Turritella	wagneriana	Turritellidae	extinct	11.317	50.156	50.156	0.120531	26.1678	-81.1072	26.248	-80.791	mPWP	70361000	291.56	296.269	304.681	8.43864e-05	0.000127285	0.000257028	1.19867e-12	1.44012e+07
gastropod	Vasum	floridanum	Turbinellidae	extinct	74.227	104.613	104.613	0.488985	26.7883	-81.3048	NA	NA	LIG	72343000	289.903	292.696	303.231	0.000213686	0.000273878	0.000670317	2.95554e-12	4.22776e+07
gastropod	Vasum	floridanum	Turbinellidae	extinct	98.402	123.002	123.002	0.665683	27.0703	-81.8586	NA	NA	LIG	72343000	291.097	293.799	303.978	0.000299624	0.000380244	0.000898022	4.14418e-12	5.3283e+07
gastropod	Vitricythara	metria	Mangeliidae	extant	1.773	5.99	5.99	0.0021037	30.3876	-84.6454	30.478	-84.3162	mPWP	72343000	289.525	293.397	304.471	3.46496e-06	4.88635e-06	1.24437e-05	4.79248e-14	709256
gastropod	Vokesimurex	bellegladeensis	Muricidae	extant	19.478	23.71	23.71	0.0289221	26.6595	-80.6765	NA	NA	LIG	55496000	289.903	292.696	303.231	1.96622e-05	2.52007e-05	6.16789e-05	3.54274e-13	3.89015e+06
gastropod	Vokesimurex	rubidus	Muricidae	extant	13.676	24.476	24.476	0.0307281	26.8811	-82.0315	26.9639	-81.7134	mPWP	55496000	293.689	296.119	304.281	2.877e-05	3.55167e-05	7.03194e-05	5.18379e-13	4.07049e+06
gastropod	Vokesimurex	rubidus	Muricidae	extant	18.792	34.213	34.213	0.0581593	26.6595	-80.6765	NA	NA	LIG	55496000	289.903	292.696	303.231	3.32392e-05	4.26022e-05	0.000104269	5.98905e-13	6.57635e+06
gastropod	Xenophora	floridana	Xenophoridae	extinct	38.932	31.65	38.932	0.0743908	27.293	-81.0072	27.3728	-80.6867	mPWP	63424000	293.689	296.119	304.281	6.38355e-05	7.88053e-05	0.000156026	1.00687e-12	9.03169e+06
gastropod	Xenophora	floridana	Xenophoridae	extinct	39.241	32.52	39.241	0.0755196	30.388	-84.6462	30.4785	-84.317	mPWP	63424000	289.525	293.397	304.471	4.46114e-05	6.29117e-05	0.000160212	7.03649e-13	9.13165e+06
gastropod	Xenophora	floridana	Xenophoridae	extinct	47.625	44.625	47.625	0.10921	27.368	-82.4364	27.4521	-82.1167	mPWP	63424000	294.79	296.364	305.185	9.3692e-05	0.000107327	0.000223928	1.47779e-12	1.20444e+07
